1 ***Plasmodium vinckei* genomes provide insights into the**  
2 **pan-genome and evolution of rodent malaria parasites**

3

4 Abhinay Ramaprasad <sup>1,2,6</sup>, Severina Klaus <sup>2,3</sup>, Richard Culleton <sup>2,4\*</sup> and Arnab Pain  
5 <sup>1,5\*</sup>

6 <sup>1</sup> Pathogen Genomics Group, BESE Division, King Abdullah University of Science  
7 and Technology (KAUST), Thuwal 23955-6900, Kingdom of Saudi Arabia

8 <sup>2</sup> Malaria Unit, Department of Pathology, Institute of Tropical Medicine (NEKKEN),  
9 Nagasaki University, 1-12-4 Sakamoto, Nagasaki 852-8523, Japan

10 <sup>3</sup> Biomedical Sciences, University of Heidelberg, Heidelberg, Germany

11 <sup>4</sup> Division of Molecular Parasitology, Proteo-Science Center, Ehime University, 454  
12 Shitsukawa, Toon, Ehime 791-0295, Japan

13 <sup>5</sup> Center for Zoonosis Control, Global Institution for Collaborative Research and  
14 Education (GI-CoRE), Hokkaido University, N20 W10 Kita-ku, Sapporo 001-0020,  
15 Japan

16 <sup>6</sup> Present address: Malaria Biochemistry Laboratory, Francis Crick Institute, London  
17 NW1 1AT, UK

18 \*arnab.pain@kaust.edu.sa, richard@nagasaki-u.ac.jp

19

20

21

22

23

24

25

## 26 **Abstract**

### 27 **Background**

28 Rodent malaria parasites (RMPs) serve as tractable tools to study malaria parasite  
29 biology and host-parasite-vector interactions. *Plasmodium vinckei* is the most  
30 geographically widespread of the four RMP species with isolates collected in five  
31 countries in sub-Saharan Central Africa between 1940s and 1970s. Several *P.*  
32 *vinckei* isolates are available but are relatively less characterized compared to other  
33 RMPs thus hampering its exploitation as rodent malaria models. We have generated  
34 a comprehensive resource for *P. vinckei* comprising of high-quality reference  
35 genomes, genotypes, gene expression profiles and growth phenotypes for ten *P.*  
36 *vinckei* isolates. This also allows for a comprehensive pan-genome analysis of the  
37 reference-quality genomes of RMPs.

38

### 39 **Results**

40 *Plasmodium vinckei* isolates display a large degree of phenotypic and genotypic  
41 diversity and potentially constitute a valuable resource to study parasite virulence  
42 and immunogenicity. The *P. vinckei* subspecies have diverged widely from their  
43 common ancestor and have undergone genomic structural variations. The  
44 subspecies from Katanga, *P. v. vinckei*, is unique among the *P. vinckei* isolates with  
45 a smaller genome size and a reduced multigene family repertoire. *P. v. vinckei*  
46 infections provide good schizont yields and is amenable to genetic manipulation,  
47 making it an ideal *vinckei* group parasite for reverse genetics. Comparing *P. vinckei*  
48 genotypes reveal region-specific selection pressures particularly on genes involved  
49 in mosquito transmission. RMP multigene family expansions observed in *P.*  
50 *chabaudi* and *P. vinckei* have occurred in their common ancestor prior to speciation.

51 The erythrocyte membrane antigen 1 (*ema1*) and *fam-c* families have considerably  
52 expanded among the lowland forests-dwelling *P. vinckei* parasites with, however,  
53 most of the *ema1* genes pseudogenised. Genetic crosses can be established in *P.*  
54 *vinckei* but are limited at present by low transmission success under the  
55 experimental conditions tested in this study.

56

## 57 **Conclusions**

58 We observe significant diversity among *P. vinckei* isolates making them particularly  
59 useful for the identification of genotype-phenotype relationships. Inclusion of *P.*  
60 *vinckei* genomes provide new insights into the evolution of RMPs and their multigene  
61 families. *Plasmodium vinckei* parasites are amenable to experimental genetic  
62 crosses and genetic manipulation, making them suitable for classical and functional  
63 genetics to study *Plasmodium* biology.

64

## 65 **Keywords**

66 *Plasmodium vinckei*, Malaria, Rodent malaria parasites, Genomics, Transcriptomics,  
67 Genetics, Parasite evolution, Multigene families

68

## 69 **Background**

70 Rodent malaria parasites (RMPs) serve as tractable models for experimental  
71 genetics and as valuable tools to study malaria parasite biology and host-parasite-  
72 vector interactions [1-4]. Between 1948 and 1974, several rodent malaria parasites  
73 were isolated from wild thicket rats (shining thicket rat - *Grammomys poensis* or  
74 previously known as *Thamnomys rutilans*, and woodland thicket rat - *Grammomys*  
75 *surdaster*) and infected mosquitoes in sub-Saharan Africa and were adapted to

76 laboratory-bred mice and mosquitoes. The isolates were classified into four species,  
77 namely, *Plasmodium berghei*, *Plasmodium yoelii*, *Plasmodium chabaudi* and  
78 *Plasmodium vinckei*. *Plasmodium berghei* and *P. yoelii* are sister species forming the  
79 classical *berghei* group, whereas *P. chabaudi* and *P. vinckei* form the classical  
80 *vinckei* group of RMPs [5-7]. *Plasmodium chabaudi* has been used for studying drug  
81 resistance, host immunity and immunopathology in malaria [8-12]. *Plasmodium yoelii*  
82 and *P. berghei* are extensively used as tractable models to study liver and mosquito  
83 stages of the parasite [13, 14]. Efficient transfection techniques [15-18] have been  
84 established in all three RMPs and they are widely used as *in vivo* model systems for  
85 large scale functional studies [19-22]. Reference genomes for these three RMP  
86 species are available [23, 24]. Recently, the quality of these genomes has been  
87 significantly improved using next-generation sequencing [11, 25, 26].

88

89 *P. vinckei* is the most geographically widespread RMP species, with isolates  
90 collected from many locations in sub-Saharan Africa (Figure 1A). Subspecies  
91 classifications were made for 18 *P. vinckei* isolates in total based on parasite  
92 characteristics and geographical origin, giving rise to five subspecies; *P. v. vinckei*  
93 (Democratic Republic of Congo), *P. v. petteri* (Central African Republic), *P. v. lentum*  
94 (Congo Brazzaville), *P. v. brucechwatti* (Nigeria) and *P. v. subsp.* (Cameroon) [27-  
95 32]. Blood, exo-erythrocytic and sporogonic stages of a limited number of isolates of  
96 the five subspecies have been characterized; *P. v. vinckei* line 67 or CY [33], *P. v.*  
97 *petteri* line CE [28], *P. v. lentum* line ZZ [29, 31], *P. v. brucechwatti* line 1/69 or DA  
98 [30, 34] and several parasite lines of *P. v. subsp.* [35]. Enzyme variation studies [5,  
99 36] and multi-locus sequencing data [6, 7] have indicated that there is significant  
100 phenotypic and genotypic variation among *P. vinckei* isolates.

101 The rodent malaria parasites isolated from Cameroon in 1974 by J. M. Bafort are  
102 currently without subspecies names, being designated as *P. yoelii* *subsp.*, *P. vinckei*  
103 *subsp.* and *P. chabaudi* *subsp.*. We now present the full genome sequence data of  
104 isolates from these subspecies and show they form distinct clades within their parent  
105 species. Therefore, we propose the following subspecies names; *Plasmodium yoelii*  
106 *cameronensis*, from the country of origin; *Plasmodium vinckei baforti*, after J. M.  
107 Bafort, the original collector of this subspecies; and *Plasmodium chabaudi*  
108 *esekanensis*, from Eséka, Cameroon, the town from the outskirts of which it was  
109 originally collected.

110

111 Very few studies have employed *P. vinckei* compared to the other RMP species  
112 despite the public availability of several *P. vinckei* isolates  
113 (<http://www.malariaresearch.eu/content/rodent-malaria-parasites>). *P. v. vinckei* v52  
114 and *P. v. petteri* CR have been used to study parasite recrudescence [37],  
115 chronobiology [38] and artemisinin resistance [39]. They are also the only isolates for  
116 which draft genome assemblies with annotation are available as part of the Broad  
117 Institute *Plasmodium* 100 Genomes initiative  
118 (<https://www.ncbi.nlm.nih.gov/bioproject/163123>).

119

120 A high-quality reference genome for *P. vinckei* and detailed phenotypic and  
121 genotypic data are lacking for the majority of *P. vinckei* isolates hindering wide-scale  
122 adoption of this RMP species in experimental malaria studies.

123

124 We now present a comprehensive genome resource for *P. vinckei* comprising of  
125 high-quality reference genomes for five *P. vinckei* isolates (one from each

126 subspecies) and describe the genotypic diversity within the *P. vinckei* clade through  
127 the sequencing of five additional *P. vinckei* isolates (see Figure 1A inset). With the  
128 aid of high-quality annotated genome assemblies and gene expression data, we  
129 evaluate the evolutionary patterns of multigene families across all RMPs and within  
130 the subspecies of *P. vinckei*.

131

132 We also describe the growth and virulence phenotypes of these isolates and show  
133 that *P. vinckei* is amenable to genetic manipulation and can be used to generate  
134 experimental genetic crosses.

135

136 Furthermore, we sequenced the whole genomes of seven isolates of the subspecies  
137 of *P. chabaudi* (*P. c. esekanensis*) and *P. yoelii* (*P. y. yoelii*, *P. y. nigeriensis*, *P. y.*  
138 *killicki* and *P. y. cameronensis*) in order to resolve evolutionary relationships among  
139 RMP isolates.

140

141 The data presented here enable the use of the *P. vinckei* clade of parasites for  
142 laboratory-based experiments driven by high-throughput genomics technologies and  
143 will significantly expand the number of RMPs available as experimental models to  
144 understand the biology of malaria parasites.

145

## 146 **Results**

### 147 ***Plasmodium vinckei* isolates display extensive diversity in virulence**

148 We followed the infection profiles of ten *P. vinckei* isolates in CBA/J mice (five  
149 biological replicates per group) to study their virulence traits. Some of these isolates  
150 were available as uncloned lines and so were first cloned by limiting dilution

151 (Additional File 1). As reported previously [40], *P. vinckei* parasites are  
152 morphologically indistinguishable from each other, prefer to invade mature  
153 erythrocytes, are largely synchronous during blood stage growth and display a  
154 characteristically rich abundance of haemozoin crystals in their trophozoites and  
155 gametocytes (Figure 1B).

156

157 Parasitaemia was determined daily to measure the growth rate of each isolate and  
158 host RBC density and weight were measured as indications of “virulence” (harm  
159 to the host) (Figure 1C, Additional file 2 and 3).

160

161 The *P. v. vinckei* isolate *PvICY*, was highly virulent and reached a parasitaemia of  
162  $89.4\% \pm 1.4$  (standard error of mean; SEM) on day 6 post inoculation of  $1 \times 10^6$   
163 blood stage parasites intravenously, causing host mortality on that day. Both strains  
164 of *P. v. brucechwatti*, *PvbDA* and *PvbDB*, were virulent and killed the host on day 7  
165 or 8 post infection (peak parasitaemia of around 70%). The *P. v. lentum* parasites  
166 *PvIDS* and *PvIDE*, were not lethal and were eventually cleared by the host immune  
167 system, with *PvIDS*'s clearance more prolonged than that of *PvIDE* (parasitaemia  
168 clearance rates; *PvIDS* =  $10.35 \text{ \%day}^{-1}$ ; SE = 1.105; p-value of linear fit =0.0025;  
169 *PvIDE* =  $16.46 \text{ \%day}^{-1}$ ; SE = 3.873; p-value =0.023). The *P. v. petteri* isolates  
170 *PvpCR* and *PvpBS* reached peak parasitaemia along similar timelines (6-7 dpi), but  
171 *PvpCR* was virulent (peak parasitaemia =  $60.35 \% \pm 2.38$  on day 6) and could  
172 sometimes kill the host while *PvpBS* maintained a mild infection.

173

174 Of the three isolates of *P. vinckei baforti*, *PvsEL* and *PvsEE* were similar in their  
175 growth profiles and their perceived effect on the host, while in contrast, *PvsEH* was

176 highly virulent, causing host mortality at day 5, the earliest among all *P. vinckei*  
177 parasites.

178

179 RBC densities reduced during the course of infection proportionally to the rise in  
180 parasitaemia in all the *P. vinckei* infection profiles studied. There were differences,  
181 however, in the patterns of host weight loss. Mild infections by *P. v. lentum* isolates  
182 (maximum weight loss in *PvIDE* = 0.43 mg  $\pm$  0.41 and *PvDS* = 1.77 mg  $\pm$  0.38), *P. v.*  
183 *petteri* BS (0.58 mg  $\pm$  0.22) and *P. v. baforti* EE (1.66 mg  $\pm$  0.31, 0.09 mg  $\pm$  0.56) did  
184 not cause any significant weight loss in mice, whereas the virulent strains, *P. v.*  
185 *petteri* CR (4.04 mg  $\pm$  0.18), *P. v. brucechwatti* isolates (*pvbDA* = 3.5 mg  $\pm$  0.39 and  
186 *pvbDB* = 2.05 mg  $\pm$  1.68) caused around a 20% decrease in weight. Virulent strains  
187 *PvCY* (1.74 mg  $\pm$  0.15) and *PvsEH* (0.52 mg  $\pm$  0.13) did not cause any significant  
188 weight loss during their infection before host death occurred.

189

### 190 ***Plasmodium vinckei* reference genome assembly and annotation**

191 High-quality reference genomes for five *P. vinckei* isolates, one from each  
192 subspecies; *P. v. vinckei* CY (*PvCY*), *P. v. brucechwatti* DA (*PvbDA*), *P. v. lentum*  
193 DE (*PvDE*), *P. v. petteri* CR (*PvpCR*) and *P. v. baforti* EL (*PvsEL*) were assembled  
194 from single-molecule real-time (SMRT) sequencing. PacBio long reads of 10-20  
195 kilobases (kb) and with a high median coverage of >155X across the genome  
196 (Additional File 1) enabled *de novo* assembly of each of the 14 chromosomes as  
197 single unitigs (high confidence contig) (see Table 1). PacBio assembly base call  
198 errors were corrected using high-quality 350bp and 550bp insert PCRfree Illumina  
199 reads. A small number of gaps remain in the assemblies, but these are mainly  
200 confined to the apicoplast genomes and to the *PvsEL* and *PvDE* genomes that were



201 assembled from 10kB-long PacBio reads instead of 20kB. The *PvpCR* and *PvCY*  
202 assemblies, with each chromosome in one piece, are a significant improvement over  
203 their existing fragmented genome assemblies (available through PlasmoDB v.30).

204

205 *Plasmodium vinckei* genome sizes range from 19.2 to 19.5 Mb except for *PvCY*  
206 which has a smaller genome size of 18.3 Mb, similar to that of *P. berghei* (both  
207 isolates are from the same Katanga region). While we were not able to resolve the  
208 telomeric repeats at the ends of some of the chromosomes, all the resolved  
209 telomeric repeats had the RMP-specific sub-telomeric repeat sequences  
210 CCCTA(G)AA. The mitochondrial and apicoplast genomes were ~6Kb and ~30 kb  
211 long respectively, except for the apicoplast genomes of *PvpCR* and *PvsEL* for which  
212 we were able to resolve only partial assemblies due to low read coverage (see  
213 Additional File 4).

214

215 Gene models were predicted by combining multiple lines of evidence to improve the  
216 quality of those predictions. These include publicly available *P. chabaudi* gene  
217 models, *de novo* predicted gene models and transcript models from strand-specific  
218 RNA-seq data of different blood life cycle stages. Consensus gene models were then  
219 manually corrected through comparative genomics and visualization of mapped  
220 RNAseq reads. As a result, we annotated 5,073 to 5,319 protein-coding genes, 57-  
221 67 tRNA genes and 40-48 rRNA genes in each *P. vinckei* genome. Functional and  
222 orthology analyses with the predicted *P. vinckei* proteins showed that the core  
223 genome content in *P. vinckei* parasites is highly conserved among the species and  
224 are comparable to other rodent and primate malaria species.

225

## 226 ***Plasmodium vinckei* genome assemblies reveal novel structural variations**

227 Comparative analysis of *P. vinckei* and other RMP genomes shows that *P. vinckei*  
228 genomes exhibit the same high level of synteny seen within RMP genomes, but with  
229 a number of chromosomal rearrangements. These events can be identified by  
230 breaks in synteny (synteny breakpoints- SBPs) observed upon aligning and  
231 comparing genome sequences.

232

233 We aligned *P. vinckei* and other RMP genomes to identify synteny blocks between  
234 their chromosomes. Similar to previous findings in RMP genomes [26, 41] (Additional  
235 file 12A), we observed large scale exchange of material between non-homologous  
236 chromosomes, namely three reciprocal translocation events and one inversion  
237 (Figure 2A, Additional File 5 and 12). A pan-*vinckei* reciprocal translocation of  
238 ~0.6Mb (with 134 genes) and ~0.4 Mb (with 99 genes) long regions between  
239 chromosomes VIII and X was observed between *P. vinckei* and *P. berghei* (whose  
240 genome closely resembles that of the putative RMP ancestor [41]). Within the *P.*  
241 *vinckei* subspecies, two reciprocal translocations separate *P. v. petteri* and *P. v.*  
242 *baforti* from the other three subspecies. One pair of exchanges (~1 Mb and ~0.55  
243 Mb) was observed between chromosomes V and XIII, and another smaller pair  
244 (~150Kb and ~70Kb) between chromosomes V and VI. These events have left the  
245 Chromosomes V of *PvCY-PvbDA-PvIDE* and *PvpCR-PvsEL* groups with only a  
246 ~0.15 Mb region of synteny between them, consisting of 48 genes while the  
247 remaining 304 genes have been rearranged with chromosome VI and XII.

248

249 There also exists a small, *PvCY*-specific inversion of a ~100 kb region in  
250 chromosome XIV. All the synteny breakage points (SBPs) were verified manually

251 and were supported by PacBio read coverage ruling out the possibility of a  
252 misassembly at the breakpoint junctions. The SBPs in chromosomes V and VI were  
253 near rRNA units, loci previously described as hotspots for such rearrangement  
254 events [42, 43].

255

## 256 **A pan-RMP phylogeny reveals high genotypic diversity within the *P. vinckei*** 257 **clade**

258 In order to re-evaluate the evolutionary relationships among RMPs, we first inferred  
259 a well-resolved species-level phylogeny that takes advantage of the manually  
260 curated gene models in eight available high-quality RMP genomes representing all  
261 RMPs. A maximum-likelihood phylogeny tree was inferred through partitioned  
262 analysis using RAxML, of a concatenated protein alignment (2,281,420 amino acids  
263 long) from 3,920 single-copy, conserved core genes in eleven taxa (eight RMPs, *P.*  
264 *falciparum*, *P. knowlesi* and *P. vivax*; see Figure 2B and Additional File 6).

265

266 In order to assess the genetic diversity within RMP isolates, we sequenced  
267 additional isolates for four *P. vinckei* subspecies (*PvbDB*, *PvIDS*, *PvpBS*, *PvsEH* and  
268 *PvsEE*), *P. yoelii yoelii* (*Pyy33X*, *PyyCN* and *PyyAR*), *P. yoelii nigeriensis* (*PynD*), *P.*  
269 *yoelii killicki* (*PyKDG*), *P. yoelii subsp.* (*PysEL*) and *P. chabaudi subsp.* (*PcsEF*)  
270 (Additional File 1). This, along with existing sequencing data for 13 RMP isolates  
271 (from [26, 44]), were used to infer an isolate-level, pan-RMP maximum likelihood  
272 phylogeny based on 1,010,956 high-quality SNPs in non-subtelomeric genes that  
273 were called by mapping all reads onto the *PvCY* reference genome (Figure 2C and  
274 Additional File 7). Both phylogenies were well-resolved with robust 100% bootstrap  
275 support obtained for the amino-acid based phylogeny and 78% or higher bootstrap

276 support for the SNPs-based phylogeny (majority-rule consensus tree criterion was  
277 satisfied at 50 bootstraps for both the phylogenies).

278

279 Both protein alignment-based and SNP-based phylogenies show significant  
280 divergence among the *P. vinckei* subspecies compared to the other RMPs. All *P.*  
281 *vinckei* subspecies have begun to diverge from their common ancestor well before  
282 sub-speciation events within *P. yoelii* and *P. chabaudi*. The Katangan isolate, *P. v.*  
283 *vinckei*, has undergone significant divergence from the common *vinckei* ancestor  
284 and is the most diverged of any RMP subspecies sequenced to date.

285

286 *Plasmodium v. brucechwatti* has also diverged significantly, while the divergence of  
287 *P. v. lentum* is comparable to that of *P. y. nigeriensis*, *P. y. kilicki* and *P. c. subsp.*  
288 from their respective putative ancestors. Genetic diversity within *P. v. petteri* and *P.*  
289 *v. baforti* isolates are similar to that observed within *P. yoelii* and *P. chabaudi*  
290 isolates while *P. v. lentum* and *P. v. brucechwatti* isolates have exceptionally high  
291 and low divergences respectively.

292

293 Our robust phylogeny based on a comprehensive set of genome-wide sequence  
294 variations confirms previous estimates of RMP evolution based on isoenzyme  
295 variation [5] and gene sequences of multiple housekeeping loci [6, 7], except for the  
296 placement of *P. y. nigeriensis* D which we show to be diverged earlier than *P. y.*  
297 *kilicki* DG (supported by a bootstrap value of 100).

298

299 **Molecular evolution within *P. vinckei* isolates**

300 Using SNP data (Additional file 7), we then assessed the differences in selection  
301 pressure on the geographically diverse *P. vinckei* isolates by calculating the gene-  
302 wise Ka/Ks ratio as a measure of enrichment of non-synonymous mutations in a  
303 gene (signifying positive selection). We first compared the Katangan isolate (*Pvvcy*)  
304 from the highland forests in the DRC with the non-Katangan isolates from the  
305 lowland forests elsewhere.

306

307 We made pairwise comparisons of the four non-Katangan *P. vinckei* subspecies with  
308 *P. v. vinckei* which revealed several genes under significant positive selection  
309 (Figure 3C). Notably, we identified three genes involved in mosquito transmission,  
310 namely, a gamete-release protein (GAMER), a secreted ookinete protein (PSOP25)  
311 and a thrombospondin-related anonymous protein (TRAP), featuring in all  
312 Katangan/non-Katangan subspecies comparisons.

313

314 GAMER (*PVVCY\_1202630* being the representative ortholog in *P. v. vinckei*) had  
315 high Ka/Ks values in all comparisons (except for *P. v. vinckei*-*P. v. brucechwatti*)  
316 and is essential for gamete egress [45]. PSOP25 (*PVVCY\_1102000*) and TRAP  
317 (*PVVCY\_1305250*) showed high Ka/Ks values in all comparisons and are essential  
318 for ookinete maturation [46] and sporozoite infectivity of mosquito salivary glands  
319 and host hepatocytes [47] respectively.

320

321 Several exported proteins and surface antigens were also identified to have  
322 undergone positive selection. *PVVCY\_0100120* has a circumsporozoite-related  
323 antigen PFAM domain (PF06589) and is a conserved protein found in all RMPs

324 except *P. berghei*. PVVCY\_1200100 is merozoite surface antigen, p41 [48] that is  
325 secreted following invasion [49].

326

327 To assess presence of geographic location-specific selection pressures among the  
328 lowland forest isolates, *P. v. brucechwatti*, *P. v. lentum* and *P. v. baforti* were  
329 compared with *P. v. petteri* CR from the CAR. To see if similar selection pressures  
330 have acted on other RMP species, we also analysed the *P. yoelii* and *P. chabaudi*  
331 isolates from these regions that we had sequenced in this study.

332

333 Several exported and rhoptry-associated proteins were identified as been under  
334 positive selection in each comparison but in contrast to comparisons with *P. v.*  
335 *vinckei*, there was no overlap of positively selected genes among the non-Katangan  
336 isolates. However, we identified a conserved rodent malaria protein of unknown  
337 function (PVVCY\_0501990) that seems to be under significant positive selection with  
338 high Ka/Ks values (ranging from 2.14 to 4.39) in all *P. vinckei* comparisons except *P.*  
339 *v. petteri* - *P. v. baforti*. The *P. yoelii* ortholog of this protein was also positively  
340 selected among *P. y. yoelii*, *P. y. nigeriensis* and *P. y. killicki* but was not under  
341 selection within the *P. y. yoelii* isolates, signifying region-specific selection pressures.

342

343 A 28kDa ookinete surface protein (P28; PVVCY\_0501540) seem to be under  
344 positive selection in the Nigerian *P. v. brucechwatti* as it features in both *P. v. vinckei*  
345 - *P. v. brucechwatti* and *P. v. brucechwatti* - *P. v. petteri* comparisons. The protein is  
346 also seen positively selected among corresponding Nigerian and Central African  
347 Republic *P. yoelii* isolates (*P. y. nigeriensis* – *P. y. yoelii*). A protein phosphatase

348 (PPM8) has also undergone positive selection in all three RMP species between  
349 CAR and Congo isolates (*P. c. chabaudi*- *P. c. adami* comparison from [26]).

350

### 351 **Evolutionary patterns within the RMP multigene families**

352 We were able to accurately annotate members of the ten RMP multigene families in  
353 the *P. vinckei* genomes owing to the well-resolved sub-telomeric regions in the  
354 Pacbio assemblies and manually curated gene models (see Table 1 and Additional  
355 file 8). Copy numbers within multigene families (exceptions were the *pir*, *etramp* and  
356 lysophospholipase families) in the Katangan isolate, *P. v. vinckei* were strikingly  
357 lower than other *P. vinckei* subspecies, similar to *P. berghei*. Multigene family sizes  
358 in the four non-Katangan *P. vinckei* subspecies were similar to *P. chabaudi* except  
359 for expansion in the *ema1* and *fam-c* multigene families (Figure 3A).

360

361 Next, we inferred maximum likelihood-based phylogenies for the ten multigene  
362 families, in order to identify structural differences amongst their members and to  
363 determine family evolutionary patterns across RMP species and *P. vinckei*  
364 subspecies (Figure 3B, Additional file 3 and 4). Overall, we identified robust clades  
365 (with bootstrap value >70) that fell into the following categories, i) pan-RMP, with  
366 orthologous genes from the four RMP species (dark grey), ii) *berghei* group, with  
367 genes from *P. berghei* and *P. yoelii* alone, iii) *vinckei* group, with genes from *P.*  
368 *chabaudi* and any or all *P. vinckei* subspecies, iv) *P. vinckei*, with genes only from *P.*  
369 *vinckei* subspecies and v) non-Katangan, with genes from all *P. vinckei* subspecies  
370 except *P. v. vinckei*.

371

372 In general, a high level of orthology was observed between *P. chabaudi* and *P.*  
373 *vinckei* genes forming several *vinckei* group clades (marked in orange in Figure 3) in  
374 contrast to more species-specific clades of paralogous genes being formed in *P.*  
375 *berghei* and *P. yoelii*. Thus, family expansions in *P. chabaudi* and *P. vinckei* seem to  
376 have occurred in the common *vinckei* group ancestor prior to speciation.

377 We rebuilt the phylogenetic trees for *pir*, *fam-a* and *fam-b* families in order to see if  
378 the previously defined clades [25, 26] were also maintained in *P. vinckei*. Overall, we  
379 were able to reproduce the tree structures for the three families using the ML method  
380 with *P. vinckei* gene family members now added to them.

381

382 For *pirs*, we obtained four long-form and eight short-form clades as in [26] (Additional  
383 file 9, tree 10) albeit with lower bootstrap support, possibly due to our overly stringent  
384 automated trimming of the sequence alignment (see Methods). With a few  
385 exceptions, *P. vinckei pir* genes majorly populated two clades - L1 and S7 and a  
386 subclade S1g. These clades, previously shown to be *P. chabaudi*-dominant, hold  
387 equal or near equal proportions of *P. vinckei pirs* too. The only other *P. chabaudi*-  
388 dominant clade, L4, remains as a completely *P. chabaudi*-specific gene expansion.  
389 No *P. vinckei* species- or subspecies-specific clades are evident except for two  
390 subclades that could be inferred as *Pv*vCY-specific expansions within L1 and S7  
391 (marked i and ii in Additional file 9, tree 10). Speciation of *P. vinckei* subspecies from  
392 their common ancestor seems to have been accompanied by gene gain in L1 and S7  
393 clades and gene loss in S1g subclade. There is an almost linear increase of around  
394 20 genes in *Pv*vCY, *Pvb*DA and *Pv*IDE in clade L1 *pirs* and a near doubling of clade  
395 S7 *pirs* in *Pvp*CR.

396



397 The *fam-a* and *fam-b* phylogenies (Additional file 9, tree 3 and 4 respectively) show  
398 that previously identified ancestral lineages [25] are maintained in *P. vinckei* too. The  
399 addition of *P. vinckei* genes resolved the ancestral clade of internal *fam-a* genes in  
400 chromosome 13 further into several well-supported *vinckei* group clades and a  
401 *berghei* group clade (marked as A in Additional file 9, tree 3). The 19 other *fam-a*  
402 clades and five *fam-b* clades consisting of positionally conserved orthologous genes  
403 are also conserved in *P. vinckei* (pan-RMP clades marked with \* in Additional file 9,  
404 tree 3 and 4). The *fam-a* family has expanded in the non-Katangan *P. vinckei*  
405 subspecies through independent events of gene duplication in their common  
406 ancestor giving rise to several non-Katangan clades (marked as B in Additional file 9,  
407 tree 3). There is only a moderate *P. vinckei*-specific expansion in *fam-b* giving rise to  
408 three clades (marked as A in Additional file 9, tree 4) that includes *Pv*CY genes too,  
409 pointing to gene duplications in the *P. vinckei* common ancestor. In both the  
410 phylogenies, species and subspecies-specific gene duplication events within the  
411 *vinckei* group are rare but do occur (marked as i-iv in Additional file 9, tree 3 and 4).

412

413 The *fam-d* multigene family is present as a single ancestral copy in *P. berghei*  
414 internally on chromosome IX but is expanded into a gene cluster in the same loci in  
415 *P. yoelii* (5 genes) and *P. chabaudi* (21 genes). Similar expansions have occurred in  
416 *P. vinckei* subspecies and phylogenetic analysis shows the presence of six robust  
417 clades within this family (Additional file 9, tree 6). Clade I is clearly the ancestral  
418 clade from which all other *fam-d* genes have been derived as it consists of the single  
419 *P. berghei* gene and its orthologs in other RMPs, positionally conserved to be the  
420 outermost gene of the *fam-d* cluster in each RMP.

421

422 While the *fam-d* family in *P. yoelii* is completely a product of paralogous expansion  
423 within Clade I, the *fam-d* families in the *vinckei* group seem to have expanded *via*  
424 five ancestral lineages forming clades II-VI. A subset of orthologs in Clade II (marked  
425 with \* in Additional file 9, tree 6) are positionally conserved among *vinckei* group  
426 parasites, located immediately after the *fam-d* ancestral copy and could therefore  
427 represent the Clade II ancestral gene in the *vinckei* group common ancestor. *Pv*CY  
428 has a smaller *fam-d* repertoire of 6 genes derived from only three of the five *vinckei*  
429 group lineages (Clade II, IV and VI), apart from the conserved ancestral copy.

430

431 ML-based trees for haloacid dehalogenase-like hydrolase (*hdh*), putative reticulocyte  
432 binding proteins (*p235*) and lysophospholipases (*lp1*) have generally well-resolved  
433 topologies with robust bootstrap support for their nodes and some clades contain  
434 syntenic orthologous genes (clades marked with \* in Additional file 9, trees 7, 8 and  
435 9) to member genes in *P. falciparum*, for example, *PfHAD2*, *PfHAD3*, *PfHAD4* and  
436 *PfRH6*. Poor bootstrap support was obtained for the *etramp* tree (Additional file 9,  
437 tree 2), however clades were identified for some members including *uis3*, *uis4* and  
438 *etramp10.2*.

439

440 In order to assess the general level of expression of multi-gene family members in  
441 blood stage parasites, we superimposed blood-stage RNAseq data onto the  
442 phylogenetic trees. Life stage specific expression of multigene family members in  
443 five RMPs – *P. berghei* (rings, trophozoites, schizonts and gametocytes) [26], *P.*  
444 *chabaudi* and *P. v. vinckei* (rings, trophozoites and schizonts) [50], *P. v. petteri* and  
445 *P. v. lentum* (rings, trophozoites and gametocytes) and mixed blood stage

446 expression levels in *P. yoelii* [44], *P. v. brucechwati* and *P. v. baforti* were assessed  
447 (Additional File 10).

448

449 The level of gene transcription was designated low for genes with normalized FPKM  
450 (Fragments Per Kilobase of transcript per Million mapped reads) less than 36,  
451 medium if between 36 and 256 and high for genes with FPKM above 256. Both the  
452 levels and life stage specificity of gene expression within the various clades were  
453 generally conserved across the RMPs signifying that orthologs in structurally distinct  
454 clades might have conserved functions across the different RMPs. In general, the  
455 proportion of transcribed genes in all multigene families in *P. vinckei* was similar to  
456 that observed in *P. chabaudi* and slightly higher than *P. berghei* and *P. yoelii*  
457 (excluding the families with only one or two *P. berghei* or *P. yoelii* members).

458

459 **The erythrocyte membrane antigen 1 and *fam-c* sub-telomeric multigene**  
460 **families are expanded in non-Katangan *P. vinckei* parasites.**

461 The erythrocyte membrane antigen 1 (EMA1) was first identified and described in *P.*  
462 *chabaudi* and is associated with the host RBC membrane [51]. These genes encode  
463 for a ~800 aa long protein and consist of two exons; a first short exon carrying a  
464 signal peptide followed by a longer exon carrying a PcEMA1 protein family domain  
465 (Pfam ID- PF07418). The gene encoding EMA1 is present only as a single copy in *P.*  
466 *yoelii* or as two copies in *P. berghei* but has expanded to 14 genes in *P. chabaudi*.  
467 We see similar gene expansions of 15 to 21 members in the four non-Katangan *P.*  
468 *vinckei* parasites (*PvbDA*, *PvIDE*, *PvpCR* and *PvsEL*; Figure 3A and Additional file  
469 3). However, almost half of these genes are pseudogenes with a conserved SNP  
470 (C>A) at base position 14 that introduces a TAA stop codon (S5X) within the signal

471 peptide region, followed by a few more stop codons in the rest of the gene (see  
472 Additional File 12B). Apart from one or two cases, the S5X mutation is found in all  
473 pseudogenes belonging to the *ema1* family and is *vinckei*-specific (it is not present in  
474 the single *P. chabaudi* pseudogene).

475

476 A ML-based phylogeny inferred for the 99 *ema1* genes was in general well-resolved  
477 with robust branch support for most nodes (see Figure 3B). Four distinct *vinckei*  
478 group-specific clades (Clade I to IV), two *vinckei*-specific clades (Clade IV and V)  
479 and a non-Katangan *P. vinckei* - specific clade (VI) with good basal support  
480 (bootstrap value of 75-100) were identified. Clade I-IV each consist of *ema1* genes  
481 positionally conserved across *P. chabaudi* and all five *P. vinckei* subspecies (in  
482 chromosomes I, VII, IX and X respectively) and are actively transcribed during blood  
483 stages.

484

485 Of the two *P. berghei* *ema1* genes, one forms a distal clade with the single *P. yoelii*  
486 gene while the other is paraphyletic within Clade IV, pointing to presence of two  
487 *ema1* loci in the common RMP ancestor, one of which was possibly lost during  
488 speciation of *P. yoelii*. All seven *PvCY* *ema1* genes are found within clades I to V  
489 with gene duplication events in Clade III and V.

490

491 Family expansion in *P. chabaudi* is mainly driven by gene duplication giving rise to *P.*  
492 *chabaudi*-specific clades. In contrast, family expansion within non-Katangan *P.*  
493 *vinckei* parasites is mainly driven by expansion of pseudogenized *ema1* genes (41  
494 genes). Except for some *P. v. brucechwatti*-specific gene expansions, the

495 pseudogenes do not form subspecies-specific clades suggesting that the expansion  
496 must have occurred in their non-Katangan *P. vinckei* common ancestor.

497

498 Gene expression data shows that the members of the *P. vinckei*-specific Clade IV  
499 are heavily transcribed during blood stages but most *ema1* pseudogenes that share  
500 ancestral lineage with Clade IV are very weakly transcribed. Taken together, a core  
501 repertoire of conserved *ema1* genes arising from 4-5 independent ancestral lineages  
502 are actively transcribed during blood stages of *P. vinckei* and *P. chabaudi*. The *ema1*  
503 multigene family expansion in *P. vinckei* is largely due to duplications of *ema1*  
504 pseudogenes, all carrying a S5X mutation and lacking transcription.

505

506 The *fam-c* proteins are exported proteins characterized by *pyst-c1* and *pyst-c2*  
507 domains, first identified in *P. yoelii* [42]. There is a considerable expansion of this  
508 family in the non-Katangan *P. vinckei* strains resulting in 59 to 65 members, twice  
509 that of *PwvCY* and other RMPs. The *fam-c* genes are exclusively found in the sub  
510 telomeric regions and are composed of two exons and an intron, of which the first  
511 exon is uniformly 80 bps long (with a few exceptions). *fam-c* proteins are  
512 approximately 100-200 amino acids long, and more than one third of the proteins in  
513 *P. vinckei* contain a transmembrane domain (75.5%) and a signal peptide (88.9%)  
514 but most of them lack a PEXEL-motif (motif was detected in only 4% of the genes  
515 compared to 24% in other RMPs).

516

517 An ML-based tree of all *fam-c* genes in the eight RMP species shows the presence  
518 of four distinctly distal clades (marked as A in Figure 3B) with robust basal support  
519 (96-100). Two of them are pan-RMP and two are *vinckei* group-specific, each

520 consisting of *fam-c* genes positionally conserved across the member subspecies  
521 (taking into account the genome rearrangement between chromosome V and VI  
522 within the *vinckei* clade). Most members of these clades show medium to high gene  
523 expression during asexual blood stages.

524

525 The remainder of the tree's topology does not have good branch support (<70) with  
526 the exception of some terminal nodes, but it does demonstrate the significant  
527 expansion of this gene family within non-Katangan *P. vinckei* parasites (clades  
528 shaded in blue).

529

530 There is evidence of significant species- and subspecies-specific expansions with  
531 striking examples in *P. yoelii*, *P. chabaudi* and in *P. v. brucechwatti* (marked i, ii and  
532 iii in Figure 3B respectively), though they do not form well-supported clades. Most  
533 *fam-c* genes in *P. yoelii* seem to have originated from such independent *P. yoelii* -  
534 specific expansion events. *P. chabaudi* and *P. v. vinckei* *fam-c* genes are found  
535 more widely dispersed throughout the tree suggesting divergence of this family in the  
536 *vinckei* group common ancestor. On the other hand, subspecies-wise distinctions  
537 among the non-Katangan *P. vinckei* *fam-c* genes are less resolved as they form both  
538 paralogous and orthologous groups between the four subspecies with several  
539 ortholog pairs strongly supported by bootstrap values.

540

541 Thus, *fam-c* gene family expansion in the non-Katangan *P. vinckei* subspecies  
542 seems to have been driven by both gene duplications in their common ancestor and  
543 subspecies-specific gene family expansions subsequent to speciation. Around  
544 half of the *fam-c* genes have detectable transcripts in asexual or sexual blood

545 stages. Most of the transcribed genes have medium ( $36 < \text{FPKM} < 256$ ) or high-level  
546 expression ( $\text{FPKM} > 256$ ) and blood-stage specific expression data for *P. chabaudi*  
547 and *P. v. vinckei* show peak transcription among the asexual blood stages at ring  
548 and schizont stages.

549

### 550 **Genetic crossing can be performed between *P. vinckei* isolates**

551 The availability of several isolates within each *P. vinckei* subspecies with varying  
552 growth rates and wide genetic diversity makes them well-suited for genetic studies.

553 Therefore, we attempted genetic crossing of the two *P. vinckei baforti* isolates,  
554 *PvsEH* and *PvsEL*, that displayed differences in their growth rates. Optimal  
555 transmission temperature and vector stages were initially characterized for *P. v.*

556 *baforti* EE, EH and EL. Each isolate was inoculated into three CBA mice and on day  
557 3 post infection, around 100 female *A. stephensi* mosquitoes were allowed to  
558 engorge on each mouse at different temperatures - 21°C, 23°C and 26°C. All three

559 *P. v. baforti* isolates were able establish infections in mosquitoes at 23°C and 26°C,  
560 producing at least 50 mature oocysts on day 15 post-feed, but failed to transmit at  
561 21°C (Figure 1A (a) and Additional file 6). Four to five oocysts of 12.5-17.5 µm

562 diameter were observed at day 8 post-feed in the mosquito midgut and around a  
563 hundred mature oocysts of 50 µm diameter could be observed at day 15 post-feed.  
564 Some of these mature oocysts had progressed into sporozoites but only a very few  
565 appeared upon disruption of the salivary glands.

566

567 To perform a genetic cross between *PvsEH* and *PvsEL*, a mixed inoculum containing  
568 equal proportions of *PvsEH* and *PvsEL* parasites was injected into CBA mice and a  
569 mosquito feed was performed on both day 3 and day 4 post-infection to increase the

570 chances of a successful transmission (Additional 7 B). For each feed, around 160  
571 female *A. stephensi* mosquitoes were allowed to take a blood meal from two  
572 anaesthetized mice at 24°C for 40 minutes without interruption.

573

574 Upon inspection of mosquito midguts for the presence of oocysts on day 9 post-feed,  
575 100% infection was observed (all midguts inspected contained oocysts) for both day  
576 3 and day 4 feeds. Around 25-100 oocysts were found per midgut in day 3 fed  
577 mosquitoes and 5-40 oocysts per midgut in day 4 fed mosquitoes. On day 12 post-  
578 feed, mature oocysts and also a high number of sporozoites were found in the  
579 midguts, but upon disrupting the salivary glands on day 20 post-feed, only a few  
580 sporozoites were found in the suspension.

581

582 Sporozoites from day 3 and 4 fed mosquitoes were injected into ICR mice (D3 and  
583 D4 respectively) and five days later, both mice became positive for blood stage  
584 parasites. In order to confirm that a genetic cross has taken place, four clones were  
585 obtained from D4 by limiting dilution to screen for presence of both *PvsEH* and  
586 *PvsEL* alleles within the chromosomes. Based on the SNPs identified between  
587 *PvsEH* and *PvsEL*, we amplified 600 to 1,000 bp regions from polymorphic genes on  
588 both ends of the 14 chromosomes that contained isolate-specific SNPs and  
589 performed Sanger sequencing of the amplicons (primer sequences in Additional file  
590 6).

591

592 Both *PvsEL*-specific (11) and *PvsEH*-specific (17) markers were found in the 28  
593 markers sequenced (one marker, PVSEL\_0600390, could not be amplified). Also,  
594 four chromosomes clearly showed evidence of chromosomal cross-over since they



595 contained markers from both isolates (see Figure 4A), thus confirming a successful  
596 *P. vinckei* genetic cross. However, all four clones had the same pattern of  
597 recombination which suggests that the diversity of recombinants in the cross-  
598 progeny was low and a single recombinant parasite might have undergone  
599 significant clonal expansion.

600

### 601 ***P. vinckei* parasites are amenable to genetic manipulation**

602 We asked if *P. vinckei* parasites can be genetically modified by applying existing  
603 transfection and genetic modification techniques routinely used in other RMPs.  
604 *Plasmodium v. vinckei* CY was chosen to test this because the isolate naturally  
605 established a synchronous infection in mice and reaches a high parasitaemia, which  
606 results in an abundance of schizonts for transfection. We aimed to produce a *Pv*CY  
607 line that constitutively expresses GFPLuc (green fluorescent protein- firefly  
608 luciferase) fusion protein, similar to those produced in *P. berghei* and *P. yoelii* [52,  
609 53]. A recombination plasmid, *pPvCY-Δp230p-gfpLuc*, was constructed to target  
610 and replace the dispensable wildtype P230p locus in *P. v. vinckei* CY  
611 (PVVCY\_0300700) with a gene cassette encoding for GFPLuc and a *hdhfr*  
612 selectable marker cassette (Figure 4B).

613

614 Transfection of purified *Pv*CY schizonts with 20 µg of linearized *pPvCY-Δp230p-*  
615 *gfpLuc* plasmid by electroporation, followed by marker selection using  
616 pyrimethamine yielded pyrimethamine-resistant transfectant parasites (*Pv*GFP-  
617 *Luc<sub>con</sub>*) on day 6 after drug treatment. Stable transfectants were cloned by limiting  
618 dilution and plasmid integration in these clones was confirmed by PCR. Constitutive  
619 expression of GFPLuc in *Pv*GFP-*Luc<sub>con</sub>* asexual and sexual blood stage parasites

620 was confirmed by fluorescence live cell imaging (Figure 4C). GFP<sub>Luc</sub> expression in  
621 PvGFP-Luc<sub>con</sub> oocysts was confirmed by fluorescence imaging of mosquito midguts  
622 7 days after blood meal.

623

## 624 **Discussion**

625 Of the four RMP species that have been adapted to laboratory mice, *P. berghei*, *P.*  
626 *yoelii* and *P. chabaudi* have been extensively used to investigate malaria parasite  
627 biology. Adopting these RMPs as tractable experimental models has been facilitated  
628 by continuous efforts in characterizing their phenotypes, sequencing their genomes  
629 and establishing protocols for parasite maintenance, genetic crossing and genetic  
630 modification. Here, we extend these efforts to *Plasmodium vinckei*.

631

632 We have systematically studied ten *P. vinckei* isolates and produced a  
633 comprehensive resource of their reference genomes, transcriptomes, genotypes and  
634 phenotypes to help establish *P. vinckei* as a useful additional experimental model for  
635 malaria.

636 Enzyme variation and molecular phylogeny studies indicate that the five subspecies  
637 of *P. vinckei* have diverged significantly from each probably due to the geographical  
638 isolation of these parasites in different locations around the African Congo basin.  
639 This diversity calls for a reference genome for each subspecies in order to capture  
640 large-scale changes in their genomes such as chromosomal structural variations and  
641 gene copy number variations that might have played a role in their speciation. To  
642 accurately capture these events, we used a combination of Pacbio and Illumina  
643 sequencing that allowed us to produce an end-to-end assembly of *P. vinckei*  
644 chromosomes. This, coupled with manual curation of the predicted gene models, led

645 to the creation of five high-quality reference genomes for *P. vinckei* that are a  
646 significant improvement to the existing fragmented genomes available for *P. v.*  
647 *vinckei* and *P. v. petteri*.

648

649 Comparative synteny analysis between *P. vinckei* and other RMP genomes reveals  
650 structural variations at both the species and the subspecies levels. Assuming that  
651 the observed variations have occurred only once, a putative pathway of genome  
652 rearrangements during RMP evolution can be inferred. No rearrangements have  
653 occurred during *P. berghei* and *P. yoelii* speciation and their genomes are likely to be  
654 identical to the RMP ancestor [41]. A reciprocal translocation between chromosomes  
655 VIII and X has accompanied the speciation of *P. vinckei*, and this is mutually  
656 exclusive from the reciprocal translocation between chromosome VII and IX that has  
657 occurred during *P. chabaudi* speciation. Following this, there has been a small  
658 inversion in chromosome X during the subspeciation of *P. v. vinckei* and  
659 translocations between chromosomes V, VI and XIII during the subspeciation of *P. v.*  
660 *petteri* (which are then carried over to *P. v. baforti*).

661

662 We generated additional sequencing data for several *P. vinckei* isolates and made  
663 available at least two genotypes per *P. vinckei* subspecies (except for *P. v. vinckei*  
664 for which only one isolate is available) so as to facilitate future studies that might  
665 employ *P. vinckei* parasites to study phenotype-genotype relationships. Similarly, we  
666 also supplemented the existing genotype information for other RMPs by sequencing  
667 several isolates from additional subspecies of *P. chabaudi* and *P. yoelii*. Our data  
668 thus comprises of genotypes from sympatric species from each region of isolation  
669 allowing us to re-evaluate the genotypic diversity and evolution among RMP isolates.

670

671 A genome-wide SNP-based phylogeny shows that the divergences between different  
672 subspecies are proportional to the level of isolation of the habitat for all RMP  
673 species. *Plasmodium vinckei*, *P. yoelii* and *P. chabaudi* isolates from sites in  
674 Cameroon have very similar genotypes to their counterparts in the Central African  
675 Republic denoting similar evolutionary pressures and perhaps the presence of gene  
676 flow across these regions, while isolates from Brazzaville (Congo) are more  
677 diverged probably due to the different environmental conditions in these locations  
678 [40].

679

680 Subspecies from West Nigeria and the DRC are highly diverged compared to  
681 subspecies from the rest of Africa. The distinctiveness of *P. berghei* and *P. v.*  
682 *vinckei*, both from the DRC is most likely due to climactic and host-vector differences  
683 in the highland forests of Katanga. Highland forests are an altitude of 1000-7000 m  
684 with mean temperature of 21C whereas the lowland forests lie at an altitude less  
685 than 800m with a mean temperature of 25 C. Different host-vector systems are  
686 prevalent in the lowland forests (*Grammomys poensis* (previously known as  
687 *Thamnomys rutilans*) - specific mosquito species unknown) and the highland  
688 Katangan forests (*Grammomys surdaster* -*Anopheles durenii millecampsi*). The  
689 associated selection pressures seem to have mainly influenced their transmission,  
690 as reflected by their lower optimal transmission temperatures and the high Ka/Ks  
691 ratios observed for three proteins that play critical functions in this process. Recently,  
692 several more rodent host and mosquito vector species have been identified in the  
693 forests of Gabon [54] implying that a diverse set of host-vector systems could have  
694 existed for RMPs. Thus, diversification of RMP species into several subspecies

695 within these isolated ecological niches might have been driven by evolutionary forces  
696 resulting from the diverse host, vector and environmental conditions experienced at  
697 each locale.

698

699 Malaria parasite genomes contain several highly polymorphic multigene families  
700 located in the sub-telomeric chromosomal regions that encode a variety of exported  
701 proteins involved in processes such as immune evasion, cytoadherence, nutrient  
702 uptake and membrane synthesis. Multigene families are thought to have evolved  
703 rapidly under the influence of immune and other evolutionary pressures resulting in  
704 copy number variations and rampant sequence reshuffling that ultimately leads to  
705 phenotypic plasticity in *Plasmodium*.

706

707 Previously, phylogenetic analyses of *pir*, *fam-a* and *fam-b* genes from three RMP  
708 species have shown that structurally distinct genes exist within these families  
709 forming robust clades with varied levels of orthology/paralogy. Identifying sub-  
710 families that have structurally diversified within the multigene families can help to  
711 better understand their functions and to this end, we constructed phylogenetic trees  
712 for the ten multigene families with genes from all four RMP species. Due to the scale  
713 of the analysis, we applied automated trimming to our alignments and limited our  
714 tree inference method to maximum likelihood. While this resulted in poor bootstrap  
715 values for some clades in the *pir*, *fam-a* and *fam-b* trees compared to previous  
716 phylogenetic analyses [25, 26], our method was able to retrieve similar tree  
717 topologies to those previously inferred and in general produced trees with good  
718 nodal support for the rest of the multigene families.

719

720 Robust pan-RMP clades identified in our study represent ancestral lineages  
721 consisting of structural orthologs that perform conserved functions across all RMPs  
722 and will be useful for future work with these families. We show that certain ancestral  
723 lineages can expand in a particular species or subspecies in response to selective  
724 pressures resulting in distinct evolutionary histories for each family. For example, the  
725 *pir* family expansion is mostly species-specific and driven by frequent gene  
726 conversion after speciation, whereas the expansion of the *fam-a* gene repertoire  
727 seems to have occurred initially in the RMP ancestor followed by species-specific  
728 expansions.

729

730 Inclusion of *P. vinckei pirs* in the RMP *pir* family phylogeny show that *P. vinckei pirs*  
731 do not form independent clades of their own and instead populate three *P. chabaudi*-  
732 dominant clades. This suggests that some of the *pir* clades were established earlier  
733 on when the classical *vinckei* and *berghei* group of parasites split from their common  
734 RMP ancestor resulting in *vinckei* group-specific clades like L1, S7 and S1g.

735

736 Similarly, the addition of *P. vinckei* genes resolved the ancestral clade of internal  
737 *fam-a* genes into several well-supported *vinckei* group clades and a *berghei* group  
738 clade. We observe similarly high level of orthology between *P. chabaudi* and *P.*  
739 *vinckei* genes in other multigene families forming several *vinckei* group clades in  
740 contrast to more species-specific clades of paralogous genes in *P. berghei* and *P.*  
741 *yoelii*. For example, within the *fam-d* family, five ancestral lineages can be identified  
742 in the *vinckei* group as opposed to only one paralogous *P. yoelii*-specific expansion  
743 within the *berghei* group. Taken together, it seems that family expansions in *P.*  
744 *chabaudi* and *P. vinckei* have occurred in the common *vinckei* group ancestor prior

745 to speciation and that multigene families have evolved quite differently across the  
746 *vinckei* and *berghei* groups of RMPs. These might be related to the striking  
747 differences in the basic phenotypes of these two groups of parasites.

748

749 We also observed size expansions in the *ema1* and *fam-c* families within the non-  
750 Katangan *P. vinckei* parasites, all being isolates from the lowlands around the Congo  
751 Basin. *Ema1* family expansions seem to be specific to lowlands dwelling *vinckei*  
752 group parasites as they are expanded in both non-Katangan *P. vinckei* and *P.*  
753 *chabaudi*. However, unlike *P. chabaudi*, the duplicated gene members in non-  
754 Katangan *P. vinckei* are all pseudogenized by a S5X mutation effectively rendering  
755 the functional repertoire to be just 6-8 genes, similar to highlands dwelling Katangan  
756 *P. v. vinckei*. Thus, it could be speculated that even under similar selective  
757 pressures, *ema1* family expansions contribute to parasite fitness in *P. chabaudi* but  
758 may not be required for the survival of sympatric *P. vinckei* parasites. The *P. vinckei*  
759 *ema1* pseudogenes could still serve as silent donor genes that recombine into  
760 functional variants to bring about antigenic variation [55]. In the case of the *fam-c*  
761 gene family, the expansion is specific to non-Katangan *P. vinckei* subspecies since  
762 *P. chabaudi*, *P. yoelii* and *P. v. vinckei* all have similar repertoire sizes. The  
763 expansions seem to be driven by gene duplications initially in their non-Katangan  
764 common ancestor and again after subspeciation.

765

766 The effect of the difference in habitats is even more pronounced in the Katangan  
767 parasite, *P. v. vinckei*. It has a smaller genome and a compact multigene family  
768 repertoire reminiscent of the only other Katangan isolate, *P. berghei* and its genetic  
769 distance from other members of the *P. vinckei* clade is in the same order of

770 magnitude as that between separate species within the RMPs. The reduced  
771 multigene family repertoire mainly consists of members belonging to pan-RMP or  
772 *vincke*-group specific ancestral lineages making it an ideal *vincke* group parasite to  
773 study the localization and function of variant proteins.

774

775 We tested whether *Pv*CY was amenable to genetic manipulation using standard  
776 transfection protocols already established for other RMPs. We were able to  
777 successfully knock-in a GFP-luciferase fusion cassette to *Pv*CY to produce a GFP-  
778 Luc reporter line for *P. v. vincke*, following a transfection protocol routinely used for  
779 modifying *P. yoelii* in our lab [44, 56]. We were able to visualise GFP-positive  
780 parasites during different blood stages and in oocysts thus confirming stable GFP-Luc  
781 expression. We were unable to visualise other life stages (sporozoites and liver  
782 stages) due to our failure to produce viable salivary gland sporozoites in this  
783 parasite.

784

785 The transfection of *P. chabaudi* has been challenging due to its slow proliferation  
786 rate and schizont sequestration resulting in low merozoite yield, thus necessitating  
787 optimized transfection protocols. In contrast, *Plasmodium v. vincke* reaches high  
788 parasitaemia without being immediately lethal to the host (90% parasitaemia on day  
789 6) and is highly synchronous yielding a large number of schizonts. A predominant  
790 population of schizonts appear near midnight in *P. v. vincke* infections, at which  
791 point, they can be Percoll-purified from exsanguinated blood and transfected with  
792 DNA.

793



794 *P. vinckei* and *P. chabaudi*, while being distinct species, share several  
795 characteristics that are common among *vinckei* group RMPs, such as a predilection  
796 for mature erythrocytes, synchronous infections and the sequestration of schizonts  
797 from peripheral circulation [33, 37, 57-59]. Thus, *P. v. vinckei* can serve as an ideal  
798 experimental model for functional studies targeting these aspects of parasite biology.  
799

800 The availability of several RMP isolates with phenotypic differences aids their use in  
801 study of parasite fitness and transmission success in mixed infections [60, 61] and  
802 for the identification of genes involved in parasite virulence, strain-specific immunity,  
803 drug resistance and host-cell preference using genetic crosses [44, 62-64]. With this  
804 in mind, we studied the virulence of ten *P. vinckei* isolates to identify differences in  
805 their growth rate and their effect on the host.

806  
807 Some of these isolates have been previously characterized [40], but we  
808 systematically profiled additional representative isolates for each subspecies (where  
809 available) under comparative conditions in the same host strain. We identified pairs  
810 of isolates with contrasting virulence phenotypes within two *P. vinckei* subspecies –  
811 *P. v. petteri* (*PvpCR* and *PvpBS*) and *P. v. baforti* (*PvsEH* and *PvsEL* or *PvsEE*).  
812 These isolate pairs would be ideal candidates for studies utilising genetic crossing to  
813 identify genetic *loci* linked to virulence using Linkage Group Selection [44].

814  
815 Since *P. vinckei* subspecies have significantly diverged from each other, isolates  
816 within the same subspecies are more likely to recombine than isolates from different  
817 subspecies. However, intra-specific hybrids between *P. v. petteri* and *P. v. baforti*  
818 may also be possible (as demonstrated earlier in *P. yoelii* [65]) since these two

819 subspecies are closely related (see Figure 2C). However, difficulties in transmitting  
820 *P. vinckei* parasites have been reported previously with either the gametocytes  
821 failing to produce midgut infections or sporozoites failing to invade the salivary  
822 glands or infections resulting in non-infective sporozoites [27, 30, 35]. Repeated  
823 attempts to create a cross between two *P. vinckei baforti* isolates failed to produce  
824 any detectable recombinants due to low frequency of mosquito transmission [35].  
825 Here, we renewed these efforts with different *P. vinckei* isolates to see if we could  
826 establish a *P. vinckei* genetic cross. Two attempts were made to create a *pvpCR* X  
827 *pvpBS* cross and further two attempts were made to create a *pvsEL* X *pvsEH* cross.  
828 However, in all attempts the sporozoites failed to optimally invade the salivary glands  
829 and we managed to isolate only a few in the *P. v. subsp* cross, subsequently  
830 obtaining a cross progeny in mice. While we were able to demonstrate a successful  
831 genetic cross by showing the presence of alleles from both isolates in the cross  
832 progeny, the recombinant diversity was quite low probably due to the transmission  
833 bottleneck. We are currently further investigating the optimal conditions for  
834 transmitting *P. vinckei*.

835

## 836 **Conclusions**

837 In this study, we have created a comprehensive resource for the rodent malaria  
838 parasite *Plasmodium vinckei*, comprising of five high-quality reference genomes, and  
839 blood stage-specific transcriptomes, genotypes and phenotypes for ten isolates. We  
840 have employed state-of-the-art sequencing technologies to produce largely complete  
841 genome assemblies and highly accurate gene models that were manually polished  
842 based on strand-specific RNA sequencing data. The unfragmented nature of our  
843 genome assemblies allowed us to characterize structural variations within *P. vinckei*

844 subspecies, which, to the best of our knowledge, is the first time that large-scale  
845 genome re-arrangements have been found among subspecies of a *Plasmodium*  
846 species.

847

848 The biological or phenotypic significance, if any, of such alterations are poorly  
849 understood, but it seems likely that they may drive speciation through the promotion  
850 of reproductive isolation of species or subspecies. Through our extensive  
851 sequencing efforts, we have generated genotype data for seventeen RMP isolates  
852 comprising of five *P. vinckei*, four *P. yoelii* and one *P. chabaudi* subspecies, thus  
853 making at least one genotype available for all subspecies of the RMP that previously  
854 lacked any sequencing data. We also systematically characterised the virulence  
855 phenotypes of the ten *P. vinckei* isolates to capture the phenotypic diversity among  
856 them. Combined, these efforts will greatly aid genetic linkage studies to resolve  
857 genotype-phenotype relationships.

858

859 In order to understand the evolutionary relationships among the RMP isolates, we  
860 have carried out a combination of analyses to describe the genotypic diversity  
861 molecular evolution of these parasites. While our phylogenies more or less agree  
862 with previous biochemical and molecular data-based studies, our reconstruction  
863 based on sequence variations on a genome scale provides higher resolution to the  
864 divergence estimates. Taking advantage of the high-quality RMP genomes produced  
865 from our work and previous studies, we also undertook a comprehensive  
866 phylogenetic analysis of multigene families across all RMP species and identify  
867 various structurally diversified sub-families with distinct evolutionary histories. This  
868 will enable future studies on the critical role of multigene families in parasite

869 adaptation, and to aid this, we have made searchable and interactive versions of the  
870 phylogenies publicly available through the iTOL online tool [66].

871

872 While genome rearrangements have occurred during speciation and sub speciation  
873 events, diversification of the multigene families seem to have occurred earlier when  
874 the RMPs split into *vinckei* and *berghei* groups of parasites. Thus, structural, copy  
875 number and nucleotide-level variations among the RMPs have occurred at various  
876 points during the evolution of RMPs in response to a variety of evolutionary  
877 pressures. The gene expression data from our study, covering specific blood stages  
878 for some *P. vinckei* subspecies, show conserved expression of multigene family  
879 members across RMPs. While not comprehensive, it complements existing RMP  
880 transcriptomes and will aid functional studies in the *P. vinckei* model. Taken  
881 together, our study provides a comprehensive view of the phenotypic and genotypic  
882 diversity within RMPs and functional diversification of the multigene families in  
883 response to selection pressures.

884

885 The synchronicity of *P. v. vinckei* infection and its unique ability to sustain high  
886 parasitaemia without killing its host culminating in good schizont yields make this  
887 parasite an attractive model for reverse genetics studies, especially those on  
888 multigene families owing to its reduced repertoire. We have successfully  
889 demonstrated genetic manipulation in *P. v. vinckei* but encountered difficulties in  
890 producing large numbers of recombinant parasites through genetic crossing.  
891 Attempts to transmit isolates from three different *P. vinckei* subspecies in *A.*  
892 *stephensi* mosquitoes failed in our hands as sporozoites repeatedly failed to infect  
893 the salivary glands. Careful optimisation of transmission parameters and serial

894 mosquito passages of the *P. vinckei* parasites might help in improving their  
895 transmission efficiency and could aid genetic linkage studies with these parasites.

896

897

898

## 899 **Methods**

### 900 **Parasite lines and experiments using mice and mosquitos**

901 The parasite lines used in this study and their original isolate information are detailed  
902 in Supplementary Table 1. Frozen parasite stabilates of cloned or uncloned lines  
903 were revived and inoculated intravenously into ICR mice. Five *P. vinckei* isolates  
904 (*Pvvcy*, *Pvbda*, *Pvbdb*, *PvIDE* and *PvsEE*) and the *P. yoelii nigeriensis* isolate  
905 (*PynD*) were uncloned stabilates and were cloned by limiting dilution to obtain clonal  
906 parasite lines.

907

908 Laboratory animal experimentation was performed in strict accordance with the  
909 Japanese Humane Treatment and Management of Animals Law (Law No. 105 dated  
910 19 October 1973 modified on 2 June 2006), and the Regulation on Animal  
911 Experimentation at Nagasaki University, Japan. The protocol was approved by the  
912 Institutional Animal Research Committee of Nagasaki University (permit:  
913 12072610052).

914

915 Six to eight weeks old female ICR or CBA mice were used in all the experiments.

916 The

917 mice were housed at 23°C and maintained on a diet of mouse feed and water. Mice

918 infected with malaria parasites were given 0.05% para-aminobenzoic acid (PABA)-

919 supplemented water to assist parasite growth.

920

921 All mosquito transmission experiments were performed using *Anopheles stephensi*

922 mosquitoes were housed in a temperature and humidity-controlled insectary at 24°C

923 and 70% humidity. Mosquito larvae were fed with mouse feed and yeast mixture and

924 adult mosquitoes were maintained on 10% glucose solution supplemented with

925 0.05% PABA.

926

### 927 **Parasite growth profiling**

928 For each isolate, an inoculum containing  $1 \times 10^6$  parasitized RBCs was injected

929 intravenously to five CBA mice. Blood smears, haematocrit readings (Beckman

930 Coulter Counter) and body weight readings were taken daily for 20 days or until host

931 mortality to monitor parasitaemia, anaemia and weight loss. Blood smears were fixed

932 with 100% methanol and stained with Geimsa's solution. The average parasitaemia

933 was calculated from parasite and total RBC counts taken at three independent

934 microscopic fields.

935

### 936 **Genomic DNA isolation and whole genome sequencing**

937 Parasitized whole blood was collected from the brachial arteries of infected mice and

938 blood sera was removed by centrifugation. RBC pellets were washed once with PBS

939 and leukocyte-depleted using CF11 (Sigma Cat# C6288) cellulose columns. Parasite

940 pellets were obtained by gentle lysis of RBCs with 0.15% saponin solution. Genomic

941 DNA extraction from the parasite pellet was performed using DNAzol reagent

942 (Invitrogen CAT # 10503027) as per manufacturer's instructions.

943

944 Single-molecule sequencing was performed for five *P. vinckei* isolates. 5-10 ug of  
945 gDNA was sheared using a Covaris g-TUBE shearing device to obtain target sizes of  
946 20kB (for *PvCY*, *PvbDA* and *PvpCR*) and 10kB (for samples *PvIDE* and *PvsEL*).  
947 Sheared DNA was concentrated using AMPure magnetic beads and SMRTbell  
948 template libraries were generated as per Pacific Biosciences instructions. Libraries  
949 were sequenced using P6 polymerase and chemistry version 4 (P6C4) on 3-6 SMRT  
950 cells and sequenced on a PacBio RS II. Reads were filtered using SMRT portal v2.2  
951 with default parameters. Read yields were 352,693, 356,960, 765,596, 386,746 and  
952 675,879 reads for *PvCY*, *PvbDA*, *PvIDE*, *PvpCR* and *PvsEL* respectively totalling  
953 around 2.7 to 4.7 Gb per sample. Mean subread lengths ranged from 6.15 to 9.1 kB.  
954 N50 of 11.7 kB and 19.2 kB were obtained for 10 and 20 kB libraries respectively.

955

956 PCR-free Illumina sequencing was performed for all RMP isolates. 1-2 ug of DNA  
957 was sheared using Covaris E series to obtain fragment sizes of 350 and 550bp.  
958 350bp and 550bp PCR-free libraries were prepared using TruSeq PCR-free DNA  
959 library preparation kits according to the manufacturer's instructions. Libraries were  
960 sequenced on the Illumina HiSeq2000 platform with 2 X 100bp paired-end read  
961 chemistry. Read yields ranged from 8-22 million reads for each library (see  
962 Additional File 1).

963

#### 964 **Genome assembly and annotation**

965 Genome assembly from long single molecule sequencing reads was performed  
966 using FALCON (v0.2.1)[67] with length cutoff for seed reads used for initial mapping  
967 set as  
968 2,000bp and for pre-assembly set as 12,000bp. The falcon sense options were set

969 as- "--min idt 0.70 --min cov 4 --local match count threshold 2 --max n read 200"  
970 and overlap filtering settings were set as "--max diff 240 --max cov 360 --min cov  
971 5 --bestn 10". 28-40 unitigs were obtained and smaller unitigs were discarded as  
972 they were exact copies of the regions already present in the larger unitigs.  
973  
974 PCR-free reads were used to correct base call errors in the unitigs using ICORN2  
975 [68], run with default settings and for 15 iterations. The unitigs were classified as  
976 chromosomes based on their homology with *P. chabaudi* chromosomes (GeneDB  
977 version 3). In *PvIDE* and *PvsEL* samples, some of the chromosomes were made of  
978 two to three unitigs with overlapping ends which were then fused and the gaps were  
979 removed manually. Apicoplast and mitochondrial genomes were assembled from  
980 PCR-free reads alone using Velvet assembler [69].  
981  
982 Syntenic regions between genome sequences were identified using MUMmer v3.2  
983 [70]. Synteny breakpoints were identified manually and were confirmed not to be  
984 misassemblies by verifying that they had continuous read coverage from PacBio and  
985 Illumina reads. Artemis Comparison tool [71, 72] and Integrative Genomics Viewer  
986 [73] were used for this purpose. The structural variations were illustrated using  
987 CIRCOS [74].  
988 *De novo* gene predictions were made using AUGUSTUS [75] trained on *P. chabaudi*  
989 gene models. RNA sequencing reads were mapped onto the reference genome  
990 using TopHat [76] to infer splice junctions. AUGUSTUS predicted gene models,  
991 junctions.bed file from TopHat and *P. chabaudi* gene models were fed into MAKER  
992 [77] to create consensus gene models that were then manually curated based on  
993 RNAseq evidence in Artemis Viewer and Artemis Comparison tool [71, 72].



994 Ribosomal RNA (rRNA) and transfer RNA (tRNA) were annotated using RNAmmer  
995 v1.2 [78]. Gene product calls were assigned to *P. vinckei* gene models based on  
996 above identified orthologous groups using custom scripts. Functional domain  
997 annotations were inferred from InterPro database using InterProScan v5.17 [79].  
998 Transmembrane domains were predicted by TMHMMv2.0 [80], signal peptide  
999 cleavage sites by SignalP v4.0 [81], presence of PEXEL/VTS motif detected using  
1000 ExportPredv4.0 [82] (with PEXEL score cutoff of 4.3).

1001

## 1002 **Transcriptomics**

1003 Total RNA was isolated for four *P. vinckei* isolates (*PvbDA*, *PvpCR*, *PvIDS* and  
1004 *PvsEL*) from mixed blood stages using TRIzol (Invitrogen) following the  
1005 manufacturer's protocol. For *PvpCR* and *PvIDS*, additionally, total RNA was isolated  
1006 from ring, trophozoite and gametocyte enriched fractions obtained using a Nycodenz  
1007 gradient.

1008 Strand-specific mRNA sequencing was performed from total RNA using TruSeq  
1009 Stranded mRNA Sample Prep Kit LT (Illumina) according to the manufacturer's  
1010 instructions. Briefly, polyA+ mRNA was purified from total RNA using oligo-dT  
1011 dynabead selection. First strand cDNA was synthesised using randomly primed  
1012 oligos followed by second strand synthesis where dUTPs were incorporated to  
1013 achieve strand-specificity. The cDNA was adapter-ligated and the libraries amplified  
1014 by PCR. Libraries were sequenced in Illumina HiSeq2000 with paired-end 100bp  
1015 read chemistry.

1016

1017 Stage-specific RNAseq data for *PvCY*'s intraerythrocytic growth stages were  
1018 obtained from an earlier study [50]. Gene expression was captured every 6 hours

1019 during *Pv*CY's 24 h IDC with three replicates, of which 6h, 12h and 24h timepoints  
1020 were used in this study to denote gene expression at ring, trophozoite and schizont  
1021 stages respectively. Similarly, for *P. chabaudi* AS, gene expression was captured  
1022 every 3h during its IDC with two replicates in a recent study [56], of which the 5.5h,  
1023 11.5h and 23.5 h timepoints on day 2 were chosen to denote ring, trophozoite and  
1024 schizont stages respectively. *P. yoelii* and *P. berghei* transcriptome data were  
1025 obtained from [26] and [44] respectively.

1026

### 1027 **SNP calling and molecular evolution analysis**

1028 Illumina paired-end reads for a total of 30 RMP isolates produced in this study or  
1029 sourced from previous studies (see Additional File 13) were used for SNP calling. In  
1030 the case of isolates sequenced in this study, the 350bp fragment size PCR-free  
1031 sequencing data was used. First, to produce a high quality pan-RMP SNP dataset  
1032 for phylogeny construction, all quality-trimmed reads were mapped onto the *Pv*CY  
1033 reference genome using BWA tool [83] with default parameters. MAPQ values of the  
1034 mapped reads were fixed and duplicated reads removed using CleanSam,  
1035 FixMateInformation and MarkDuplicates commands in picardtools  
1036 (<http://broadinstitute.github.io/picard>) and only uniquely mapped reads were retained  
1037 using samtools with parameter -q 1 (<http://www.htslib.org/>). Raw SNPs were called  
1038 from the mapped reads using samtools mpileup and bcftools with following  
1039 parameters- minimum base quality of 20, minimum mapping quality of 10 and ploidy  
1040 of 1. SNPs with quality (QUAL) less than 20, read depth (DP) less than 10, mapping  
1041 quality (MQ) less than 2 and allele frequency (AF1) less than 80% were removed.  
1042 Further, only SNPs present in protein-coding genes were retained and those present

1043 in low-complexity regions (predicted by DustMasker [84]) and sub-telomeric  
1044 multigene family members were excluded.

1045

1046 The filtered SNPs from different samples were merged and SNP positions with  
1047 missing calls in more than six samples were removed. This filtered high-quality set of  
1048 1,020,956 SNP positions were used to infer maximum likelihood phylogeny (see  
1049 Additional File 7).

1050

1051 For inferring Ka/Ks ratios between *P. vinckei* isolates and *PvvCY*, filtered SNPs  
1052 obtained above were merged as before but excluding *PvpBS* due to its high missing  
1053 call rate. Only SNP positions with no missing calls in any sample were retained and  
1054 morphed onto *PvvCY* gene sequences using gatk command  
1055 FastaAlternateReferenceMaker [85] to produce isolate-specific gene sequences  
1056 which were then used for pairwise sequence comparisons to identify synonymous  
1057 and non-synonymous substitutions. Ka/Ks ratios were calculated using KaKs  
1058 Calculator [86] and averaged across isolates if more than one was available for a  
1059 subspecies.

1060

1061 For comparisons against *P. v. petteri*, *P. yoelii* and *P. chabaudi*, sample reads were  
1062 mapped onto *PvpCR*, *P. yoelii* 17X and *P. chabaudi* AS genomes respectively and  
1063 subsequent steps were followed as before. Similar to *PvpBS*, *PysEL* was excluded  
1064 from Ka/Ks analysis due to high missing rate.

1065

1066 **Phylogenetic analysis**

1067 For constructing species-level phylogenies, orthologous proteins were identified  
1068 between the five *P. vinckei* genomes, three RMP genomes, *P. falciparum*, *P.*  
1069 *knowlesi* and *P. vivax* genomes using OrthoMCL v2.0.9 [87] with inflation parameter  
1070 as 1.5, BLAST hit evaluate cutoff as  $1e^{-5}$  and percentage match cutoff as 50%.

1071

1072 One-to-one orthologous proteins from each of the 3,920 ortholog groups that form  
1073 the core proteome were aligned using MUSCLE [88]. Alignments were trimmed  
1074 using trimAl [89] removing all gaps and concatenated into a partitioned alignment  
1075 using catsequence. An initial RAxML [90] run was performed on individual  
1076 alignments to identify best amino acid substitution model under the Akaike  
1077 Information Criterion (--auto-prot=aic). These models were then used to run a  
1078 partitioned RAxML analysis on the concatenated protein alignment using  
1079 PROTAMMA model for rate heterogeneity.

1080

1081 For constructing isolate-level phylogeny, the vcf files containing high-quality SNPs  
1082 were first converted to a matrix for phylogenetic analysis using vcf2phylip  
1083 (<https://github.com/edgardomortiz/vcf2phylip>). RAxML tree inference was performed  
1084 using GTRGAMMA model for rate heterogeneity along with ascertainment bias  
1085 correction (--asc-corr=stamatakis) since we used only variant sites.

1086

1087 Maximum likelihood trees for multigene families were constructed based on  
1088 nucleotide sequence alignments of member genes that included intron sequences if  
1089 present (except in the case of *pir* family where introns were excluded). Alignments  
1090 were performed using MUSCLE with default parameters, frame-shifts edited  
1091 manually in AliView [91] followed by automated trimming with trimAl using -gappyout

1092 parameter. In all the phylogenies, bootstrapping was conducted until the majority-  
1093 rule consensus tree criterion (-I autoMRE) was satisfied (usually 150-300 replicates).  
1094 Phylogenetic trees were visualized and annotated in the iTOL server [66].

1095

#### 1096 **Plasmid construction and transfection in *P. vinckei***

1097 The pPvCY-p230p-gfpLuc plasmid was constructed using MultiSite Gateway  
1098 cloning  
1099 system (Invitrogen). attB-flanked 5'and 3'homology arms were obtained by  
1100 amplifying  
1101 800bp regions upstream and downstream of PVVCY\_0300700. These fragments  
1102 were subjected to independent BP recombination with pDONRP4-P1R (Invitrogen) to  
1103 generate entry plasmids pENT12-5U and pENT41-3U, respectively. Similarly, the  
1104 gfpLuc cassette from pL1063 was amplified and subjected to LR reaction to obtain  
1105 pENT23-gfpLuc. BP reaction was performed using the BP Clonase II enzyme mix  
1106 (Invitrogen) according to the manufacturer's instructions.

1107

1108 *Plasmodium vinckei vinckei* CY schizont-enriched fraction was collected by  
1109 differential centrifugation on 50% Nycodenz in incomplete RPMI1640 medium, and  
1110 20 ug of ApaI- and StuI-double digested linearized transfection constructs were  
1111 electroporated to  $1 \times 10^7$  of enriched schizonts using a Nucleofector device (Amaxa)  
1112 with human T-cell solution under program U-33. Transfected parasites were  
1113 intravenously injected into  
1114 7-week-old ICR female mice, which were treated by administering pyrimethamine in  
1115 the drinking water (0.07 mg/mL) 24 hours later for a period of 4-7 days. Drug  
1116 resistant parasites were cloned by limiting dilution with an inoculum of 0.3

1117 parasites/100 uL injected into 10 female ICR mice. Two clones were obtained, and  
1118 integration of the transfection constructs was confirmed by PCR amplification with a  
1119 unique set of primers for the modified p230p gene locus. Live imaging of parasites  
1120 was performed on thin smears of parasite-infected blood prepared on glass slides  
1121 stained with Hoechst 33342. Fluorescent and differential interference contrast (DIC)  
1122 images were captured using an AxioCam MRm CCD camera (Carl Zeiss, Germany)  
1123 fixed to an Axio imager Z2 fluorescent microscope with a Plan-Apochromat 100  $\times$ /1.4  
1124 oil immersion lens (Carl Zeiss) and Axiovision software (Carl Zeiss). GFP-expressing  
1125 *P. vinckei* oocysts in mosquito midguts were imaged in SMZ25 microscope (Nikon).

1126

#### 1127 **Mosquito transmission and genetic crossing of *P. vinckei* parasites**

1128 To determine the optimal transmission temperature for *P. vinckei baforti* isolates,  
1129 infected CBA mice were anaesthetized on day 3 post-inoculation and ~100 female  
1130 *Anopheles stephensi* mosquitoes (7 to 12 days post emergence) were allowed to  
1131 take a blood meal for 30 min without interruption after confirming presence of  
1132 gametocytes by microscopy. Three batches of ~100 mosquitoes were fed at three  
1133 different temperatures - 21°C, 23°C and 26°C. The fed mosquitoes were maintained  
1134 at the feed temperatures and at 70% humidity. To check for presence of  
1135 oocysts/sporozoitcs, mosquitoes were dissected, and their midguts or salivary  
1136 glands were suspended in a drop of PBS solution atop a glass slide, covered by a  
1137 coverslip and studied under a microscope.

1138

1139 For genetic crossing, isolates were harvested from donor mice and mixed to achieve  
1140 a 1:1 ratio and  $1 \times 10^6$  parasites of this mixture was inoculated into four female CBA  
1141 mice. Three days after inoculation, after confirming the presence of gametocytes,

1142 two infected CBA mice were anaesthetized and placed on two mosquito cages, each  
1143 containing around 80 mosquitoes each. Mosquitoes were allowed to feed on the  
1144 mice without interruption for 40 minutes at 24°C. A fresh feed was again performed  
1145 on the 4th day post-inoculation with the other two CBA mice and two fresh cages of  
1146 mosquitoes. 5-10 female mosquitoes from each cage were dissected on the 9th and  
1147 12th day after the blood meal to check for presence of oocysts in the mosquito  
1148 midguts. Twenty days after the blood meal, the mosquitoes were dissected and the  
1149 salivary glands were removed, placed in 0.5-0.7 ml PBS solution and gently  
1150 disrupted  
1151 to release sporozoites. The suspensions from day 3 and day 4 feeds were injected  
1152 intravenously into an ICR mouse each. When the mice were positive for blood-stage  
1153 parasites, they were sub-inoculated into ten ICR mice with an inoculum of 0.6  
1154 parasites/100uL to obtain clones from the potential cross progeny by limiting dilution.  
1155 Eight days post infection, four mice were positive for parasites and these clones  
1156 were screened for the presence of both *PvsEH* and *PvsEL* alleles within the  
1157 chromosomes.

1158

## 1159 **Declarations**

### 1160 **Ethics approval and consent to participate**

1161 Laboratory animal experimentation was performed in strict accordance with the  
1162 Japanese Humane Treatment and Management of Animals Law (Law No. 105 dated  
1163 19 October 1973 modified on 2 June 2006), and the Regulation on Animal  
1164 Experimentation at Nagasaki University, Japan. The protocol was approved by the  
1165 Institutional Animal Research Committee of Nagasaki University (permit:  
1166 12072610052).

1167

1168 **Consent for publication**

1169 Not applicable

1170 **Availability of data and materials**

1171 All genome sequences, gene annotations and sequencing data files generated in  
1172 this study can be found in ENA Study: PRJEB19355. All the datasets would also be  
1173 available via EuPathDB portal at the time of publication. All parasite resources will be  
1174 made available to the scientific community via the BEI Resources  
1175 (<https://www.beiresources.org/>). Searchable and interactive versions of the  
1176 phylogeny trees produced in this study can be accessed at  
1177 <https://itol.embl.de/shared/2ICr6w0mdDENs>.

1178 **Competing interests**

1179 The authors declare that they have no competing interests.

1180

1181 **Funding**

1182 RC was supported by a Grant (JP16K21233) from the Japan Society for the  
1183 Promotion of Science. This work was supported by KAUST faculty baseline fund  
1184 (BAS/1/1020-01-01) and Competitive Research Fund (URF/1/2267-01-01) to AP.

1185

1186 **Authors' contributions**

1187 RC and AP conceived the study. AR and RC conducted all rodent and mosquito  
1188 experiments. AR, SK and RC conducted genetic cross experiments. AR collected  
1189 data and performed all bioinformatic analyses. AR wrote the manuscript and all  
1190 authors contributed to it.

1191



## 1192 **Acknowledgements**

1193 The authors would like to acknowledge the personnel at the Bioscience Core  
1194 Laboratory (BCL) at King Abdullah University of Science and Technology for their  
1195 help with next generation sequencing. We acknowledge the contribution of Professor  
1196 Richard Carter, whose support of this work was crucial to its inception and  
1197 completion.

1198

## 1199 **Authors' information (optional)**

1200 Not applicable.

1201

## 1202 **References**

- 1203 1. Carlton JM, Hayton K, Cravo PV, Walliker D: **Of mice and malaria mutants:**  
1204 **unravelling the genetics of drug resistance using rodent malaria models.** *Trends*  
1205 *Parasitol* 2001, **17**(5):236-242.
- 1206 2. Culleton RL, Abkallo HM: **Malaria parasite genetics: doing something useful.**  
1207 *Parasitol Int* 2015, **64**(3):244-253.
- 1208 3. Matz JM, Kooij TW: **Towards genome-wide experimental genetics in the in vivo**  
1209 **malaria model parasite *Plasmodium berghei*.** *Pathog Glob Health* 2015, **109**(2):46-  
1210 60.
- 1211 4. De Niz M, Heussler VT: **Rodent malaria models: insights into human disease and**  
1212 **parasite biology.** *Curr Opin Microbiol* 2018, **46**:93-101.
- 1213 5. Carter R: **Studies on enzyme variation in the murine malaria parasites *Plasmodium***  
1214 ***berghei*, *P. yoelii*, *P. vinckei* and *P. chabaudi* by starch gel electrophoresis.**  
1215 *Parasitology* 1978, **76**(3):241-267.
- 1216 6. Perkins SL, Sarkar IN, Carter R: **The phylogeny of rodent malaria parasites:**  
1217 **simultaneous analysis across three genomes.** *Infect Genet Evol* 2007, **7**(1):74-83.
- 1218 7. Ramiro RS, Reece SE, Obbard DJ: **Molecular evolution and phylogenetics of rodent**  
1219 **malaria parasites.** *BMC Evol Biol* 2012, **12**:219.
- 1220 8. Cravo PV, Carlton JM, Hunt P, Bisoni L, Padua RA, Walliker D: **Genetics of mefloquine**  
1221 **resistance in the rodent malaria parasite *Plasmodium chabaudi*.** *Antimicrob Agents*  
1222 *Chemother* 2003, **47**(2):709-718.
- 1223 9. Langhorne J, Quin SJ, Sanni LA: **Mouse models of blood-stage malaria infections:**  
1224 **immune responses and cytokines involved in protection and pathology.** *Chem*  
1225 *Immunol* 2002, **80**:204-228.
- 1226 10. Spence PJ, Jarra W, Levy P, Reid AJ, Chappell L, Brugat T, Sanders M, Berriman M,  
1227 Langhorne J: **Vector transmission regulates immune control of *Plasmodium***  
1228 **virulence.** *Nature* 2013, **498**(7453):228-231.

- 1229 11. Brugat T, Reid AJ, Lin J, Cunningham D, Tumwine I, Kushinga G, McLaughlin S, Spence  
1230 P, Bohme U, Sanders M *et al*: **Antibody-independent mechanisms regulate the**  
1231 **establishment of chronic Plasmodium infection.** *Nat Microbiol* 2017, **2**:16276.
- 1232 12. Stephens R, Culleton RL, Lamb TJ: **The contribution of Plasmodium chabaudi to our**  
1233 **understanding of malaria.** *Trends Parasitol* 2012, **28**(2):73-82.
- 1234 13. Prudencio M, Mota MM, Mendes AM: **A toolbox to study liver stage malaria.** *Trends*  
1235 *Parasitol* 2011, **27**(12):565-574.
- 1236 14. Guttery DS, Roques M, Holder AA, Tewari R: **Commit and Transmit: Molecular**  
1237 **Players in Plasmodium Sexual Development and Zygote Differentiation.** *Trends*  
1238 *Parasitol* 2015, **31**(12):676-685.
- 1239 15. Pfander C, Anar B, Schwach F, Otto TD, Brochet M, Volkmann K, Quail MA, Pain A,  
1240 Rosen B, Skarnes W *et al*: **A scalable pipeline for highly effective genetic**  
1241 **modification of a malaria parasite.** *Nat Methods* 2011, **8**(12):1078-1082.
- 1242 16. Marr E, Milne R, Anar B, Girling G, Schwach F, Mooney J, Nahrendorf W, Spence P,  
1243 Cunningham D, Baker D *et al*: **An enhanced toolkit for the generation of knockout**  
1244 **and marker-free fluorescent Plasmodium chabaudi [version 1; peer review: 2**  
1245 **approved].** *Wellcome Open Research* 2020, **5**(71).
- 1246 17. Janse CJ, Ramesar J, Waters AP: **High-efficiency transfection and drug selection of**  
1247 **genetically transformed blood stages of the rodent malaria parasite Plasmodium**  
1248 **berghei.** *Nat Protoc* 2006, **1**(1):346-356.
- 1249 18. Jongco AM, Ting LM, Thathy V, Mota MM, Kim K: **Improved transfection and new**  
1250 **selectable markers for the rodent malaria parasite Plasmodium yoelii.** *Mol Biochem*  
1251 *Parasitol* 2006, **146**(2):242-250.
- 1252 19. Bushell E, Gomes AR, Sanderson T, Anar B, Girling G, Herd C, Metcalf T, Modrzynska  
1253 K, Schwach F, Martin RE *et al*: **Functional Profiling of a Plasmodium Genome**  
1254 **Reveals an Abundance of Essential Genes.** *Cell* 2017, **170**(2):260-272 e268.
- 1255 20. Stanway RR, Bushell E, Chiappino-Pepe A, Roques M, Sanderson T, Franke-Fayard B,  
1256 Caldelari R, Golomingi M, Nyonda M, Pandey V *et al*: **Genome-Scale Identification of**  
1257 **Essential Metabolic Processes for Targeting the Plasmodium Liver Stage.** *Cell* 2019,  
1258 **179**(5):1112-1128 e1126.
- 1259 21. Antonova-Koch Y, Meister S, Abraham M, Luth MR, Ottilie S, Lukens AK, Sakata-Kato  
1260 T, Vanaerschot M, Owen E, Jado JC *et al*: **Open-source discovery of chemical leads**  
1261 **for next-generation chemoprotective antimalarials.** *Science* 2018, **362**(6419).
- 1262 22. de Koning-Ward TF, Gilson PR, Crabb BS: **Advances in molecular genetic systems in**  
1263 **malaria.** *Nat Rev Microbiol* 2015, **13**(6):373-387.
- 1264 23. Carlton JM, Angiuoli SV, Suh BB, Kooij TW, Perteau M, Silva JC, Ermolaeva MD, Allen JE,  
1265 Selengut JD, Koo HL *et al*: **Genome sequence and comparative analysis of the model**  
1266 **rodent malaria parasite Plasmodium yoelii yoelii.** *Nature* 2002, **419**(6906):512-519.
- 1267 24. Hall N, Karras M, Raine JD, Carlton JM, Kooij TW, Berriman M, Florens L, Janssen CS,  
1268 Pain A, Christophides GK *et al*: **A comprehensive survey of the Plasmodium life cycle**  
1269 **by genomic, transcriptomic, and proteomic analyses.** *Science* 2005, **307**(5706):82-  
1270 86.
- 1271 25. Fougere A, Jackson AP, Bechtsi DP, Braks JA, Annoura T, Fonager J, Spaccapelo R,  
1272 Ramesar J, Chevalley-Maurel S, Klop O *et al*: **Variant Exported Blood-Stage Proteins**  
1273 **Encoded by Plasmodium Multigene Families Are Expressed in Liver Stages Where**  
1274 **They Are Exported into the Parasitophorous Vacuole.** *PLoS Pathog* 2016,  
1275 **12**(11):e1005917.

- 1276 26. Otto TD, Bohme U, Jackson AP, Hunt M, Franke-Fayard B, Hoeijmakers WA, Religa AA,  
1277 Robertson L, Sanders M, Ogun SA *et al*: **A comprehensive evaluation of rodent**  
1278 **malaria parasite genomes and gene expression**. *BMC Biol* 2014, **12**:86.
- 1279 27. Bafort JM: **The biology of rodent malaria with particular reference to Plasmodium**  
1280 **vinckei vinckei Rodhain 1952**. *Ann Soc Belges Med Trop Parasitol Mycol* 1971,  
1281 **51**(1):5-203.
- 1282 28. Carter R, Walliker D: **New observations on the malaria parasites of rodents of the**  
1283 **Central African Republic - Plasmodium vinckei petteri subsp. nov. and Plasmodium**  
1284 **chabaudi Landau, 1965**. *Ann Trop Med Parasitol* 1975, **69**(2):187-196.
- 1285 29. Carter R, Walliker D: **Malaria parasites of rodents of the Congo (Brazzaville):**  
1286 **Plasmodium chabaudi adami subsp. nov. and Plasmodium vinckei lentum Landau,**  
1287 **Michel, Adam and Boulard, 1970**. *Ann Parasitol Hum Comp* 1976, **51**(6):637-646.
- 1288 30. Killick-Kendrick R: **Parasitic Protozoa of the blood of rodents. V. Plasmodium**  
1289 **vinckei brucechwatti subsp. nov. A malaria parasite of the thicket rat, Thamnomys**  
1290 **rutilans, in Nigeria**. *Ann Parasitol Hum Comp* 1975, **50**(3):251-264.
- 1291 31. Landau I, Michel JC, Adam JP, Boulard Y: **The life cycle of Plasmodium vinckei**  
1292 **lentum subsp. nov. in the laboratory; comments on the nomenclature of the**  
1293 **murine malaria parasites**. *Ann Trop Med Parasitol* 1970, **64**(3):315-323.
- 1294 32. Bafort J: **New isolations of murine malaria in Africa: Cameroon**. In: *5th International*  
1295 *Congress of Protozoology, New York City Abstracts of papers p343: 1977*.
- 1296 33. Bafort J: **Etude du cycle biologique du Plasmodium v. vinckei Rodhain 1952**. *Ann*  
1297 *Soc Belge Méd Trop* 1969, **49**(6):533-628.
- 1298 34. Bafort JM, Molyneux DH: **Liver infections with Plasmodium v. vinckei in hosts**  
1299 **refractory to blood infection**. *Trans R Soc Trop Med Hyg* 1971, **65**(1):13.
- 1300 35. Lainson FA: **Observations on the morphology and electrophoretic variation of**  
1301 **enzymes of the rodent malaria parasites of Cameroon, Plasmodium yoelii, P.**  
1302 **chabaudi and P. vinckei**. *Parasitology* 1983, **86 (Pt 2)**:221-229.
- 1303 36. Carter R: **Enzyme variation in Plasmodium berghei and Plasmodium vinckei**.  
1304 *Parasitology* 1973, **66**(2):297-307.
- 1305 37. LaCrue AN, Scheel M, Kennedy K, Kumar N, Kyle DE: **Effects of artesunate on**  
1306 **parasite recrudescence and dormancy in the rodent malaria model Plasmodium**  
1307 **vinckei**. *PLoS One* 2011, **6**(10):e26689.
- 1308 38. Gautret P, Deharo E, Chabaud AG, Ginsburg H, Landau I: **Plasmodium vinckei vinckei,**  
1309 **P. v. lentum and P. yoelii yoelii: chronobiology of the asexual cycle in the blood**.  
1310 *Parasite* 1994, **1**(3):235-239.
- 1311 39. Chandra R, Kumar S, Puri SK: **Plasmodium vinckei: infectivity of arteether-sensitive**  
1312 **and arteether-resistant parasites in different strains of mice**. *Parasitol Res* 2011,  
1313 **109**(4):1143-1149.
- 1314 40. Killick-Kendrick R, Peters W: **Rodent malaria**. London: Academic Press; 1978.
- 1315 41. Kooij TW, Carlton JM, Bidwell SL, Hall N, Ramesar J, Janse CJ, Waters AP: **A**  
1316 **Plasmodium whole-genome synteny map: indels and synteny breakpoints as foci**  
1317 **for species-specific genes**. *PLoS Pathog* 2005, **1**(4):e44.
- 1318 42. Carlton J, Angiuoli S, Suh B, Kooij T, Perteza M, Silva J, Ermolaeva M, Allen J, Selengut  
1319 J, Koo H *et al*: **Genome sequence and comparative analysis of the model rodent**  
1320 **malaria parasite Plasmodium yoelii yoelii**. *Nature* 2002, **419**(6906):512-519.
- 1321 43. Liu SL, Sanderson KE: **Rearrangements in the genome of the bacterium Salmonella**  
1322 **typhi**. *Proc Natl Acad Sci U S A* 1995, **92**(4):1018-1022.

- 1323 44. Abkallo HM, Martinelli A, Inoue M, Ramaprasad A, Xangsayarath P, Gitaka J, Tang J,  
1324 Yahata K, Zoungrana A, Mitaka H *et al*: **Rapid identification of genes controlling**  
1325 **virulence and immunity in malaria parasites.** *PLoS Pathog* 2017, **13**(7):e1006447.
- 1326 45. Akinosoglou KA, Bushell ES, Ukegbu CV, Schlegelmilch T, Cho JS, Redmond S, Sala K,  
1327 Christophides GK, Vlachou D: **Characterization of Plasmodium developmental**  
1328 **transcriptomes in Anopheles gambiae midgut reveals novel regulators of malaria**  
1329 **transmission.** *Cell Microbiol* 2015, **17**(2):254-268.
- 1330 46. Zheng W, Liu F, He Y, Liu Q, Humphreys GB, Tsuboi T, Fan Q, Luo E, Cao Y, Cui L:  
1331 **Functional characterization of Plasmodium berghei PSOP25 during ookinete**  
1332 **development and as a malaria transmission-blocking vaccine candidate.** *Parasit*  
1333 *Vectors* 2017, **10**(1):8.
- 1334 47. Sultan AA, Thathy V, Frevert U, Robson KJ, Crisanti A, Nussenzweig V, Nussenzweig  
1335 RS, Menard R: **TRAP is necessary for gliding motility and infectivity of plasmodium**  
1336 **sporozoites.** *Cell* 1997, **90**(3):511-522.
- 1337 48. Sanders PR, Gilson PR, Cantin GT, Greenbaum DC, Nebl T, Carucci DJ, McConville MJ,  
1338 Schofield L, Hodder AN, Yates JR, 3rd *et al*: **Distinct protein classes including novel**  
1339 **merozoite surface antigens in Raft-like membranes of Plasmodium falciparum.** *J*  
1340 *Biol Chem* 2005, **280**(48):40169-40176.
- 1341 49. Taechalertpaisarn T, Crosnier C, Bartholdson SJ, Hodder AN, Thompson J,  
1342 Bustamante LY, Wilson DW, Sanders PR, Wright GJ, Rayner JC *et al*: **Biochemical and**  
1343 **functional analysis of two Plasmodium falciparum blood-stage 6-cys proteins: P12**  
1344 **and P41.** *PLoS One* 2012, **7**(7):e41937.
- 1345 50. Ramaprasad A, Subudhi AK, Culleton R, Pain A: **A fast and cost-effective**  
1346 **microsampling protocol incorporating reduced animal usage for time-series**  
1347 **transcriptomics in rodent malaria parasites.** *Malar J* 2019, **18**(1):26.
- 1348 51. Favaloro JM, Kemp DJ: **Sequence diversity of the erythrocyte membrane antigen 1**  
1349 **in various strains of Plasmodium chabaudi.** *Mol Biochem Parasitol* 1994, **66**(1):39-  
1350 47.
- 1351 52. Miller JL, Murray S, Vaughan AM, Harupa A, Sack B, Baldwin M, Crispe IN, Kappe SH:  
1352 **Quantitative bioluminescent imaging of pre-erythrocytic malaria parasite infection**  
1353 **using luciferase-expressing Plasmodium yoelii.** *PLoS One* 2013, **8**(4):e60820.
- 1354 53. Franke-Fayard B, Trueman H, Ramesar J, Mendoza J, van der Keur M, van der Linden  
1355 R, Sinden RE, Waters AP, Janse CJ: **A Plasmodium berghei reference line that**  
1356 **constitutively expresses GFP at a high level throughout the complete life cycle.** *Mol*  
1357 *Biochem Parasitol* 2004, **137**(1):23-33.
- 1358 54. Boundenga L, Ngoubangoye B, Ntie S, Moukoudoum ND, Renaud F, Rougeron V,  
1359 Prugnolle F: **Rodent malaria in Gabon: Diversity and host range.** *Int J Parasitol*  
1360 *Parasites Wildl* 2019, **10**:117-124.
- 1361 55. Palmer GH, Brayton KA: **Gene conversion is a convergent strategy for pathogen**  
1362 **antigenic variation.** *Trends Parasitol* 2007, **23**(9):408-413.
- 1363 56. Subudhi AK, O'Donnell AJ, Ramaprasad A, Abkallo HM, Kaushik A, Ansari HR, Abdel-  
1364 Haleem AM, Ben Rached F, Kaneko O, Culleton R *et al*: **Malaria parasites regulate**  
1365 **intra-erythrocytic development duration via serpentine receptor 10 to coordinate**  
1366 **with host rhythms.** *Nat Commun* 2020, **11**(1):2763.
- 1367 57. Voza T, Gautret P, Renia L, Gantier JC, Lombard MN, Chabaud AG, Landau I:  
1368 **Variation in murid Plasmodium desequestration and its modulation by stress and**  
1369 **pentoxifylline.** *Parasitol Res* 2002, **88**(4):344-349.

- 1370 58. Clark IA, Cowden WB, Butcher GA, Hunt NH: **Possible roles of tumor necrosis factor**  
1371 **in the pathology of malaria.** *Am J Pathol* 1987, **129**(1):192-199.
- 1372 59. Yoeli M, Hargreaves BJ: **Brain capillary blockage produced by a virulent strain of**  
1373 **rodent malaria.** *Science* 1974, **184**(4136):572-573.
- 1374 60. Tang J, Templeton TJ, Cao J, Culleton R: **The Consequences of Mixed-Species Malaria**  
1375 **Parasite Co-Infections in Mice and Mosquitoes for Disease Severity, Parasite**  
1376 **Fitness, and Transmission Success.** *Front Immunol* 2019, **10**:3072.
- 1377 61. Abkallo HM, Tangena JA, Tang J, Kobayashi N, Inoue M, Zoungrana A, Colegrave N,  
1378 Culleton R: **Within-host competition does not select for virulence in malaria**  
1379 **parasites; studies with Plasmodium yoelii.** *PLoS Pathog* 2015, **11**(2):e1004628.
- 1380 62. Martinelli A, Cheesman S, Hunt P, Culleton R, Raza A, Mackinnon M, Carter R: **A**  
1381 **genetic approach to the de novo identification of targets of strain-specific**  
1382 **immunity in malaria parasites.** *Proc Natl Acad Sci U S A* 2005, **102**(3):814-819.
- 1383 63. Culleton R, Martinelli A, Hunt P, Carter R: **Linkage group selection: rapid gene**  
1384 **discovery in malaria parasites.** *Genome Res* 2005, **15**(1):92-97.
- 1385 64. Pattaradilokrat S, Culleton RL, Cheesman SJ, Carter R: **Gene encoding erythrocyte**  
1386 **binding ligand linked to blood stage multiplication rate phenotype in Plasmodium**  
1387 **yoelii yoelii.** *Proc Natl Acad Sci U S A* 2009, **106**(17):7161-7166.
- 1388 65. Knowles G, Sanderson A, Walliker D: **Plasmodium yoelii: genetic analysis of crosses**  
1389 **between two rodent malaria subspecies.** *Exp Parasitol* 1981, **52**(2):243-247.
- 1390 66. Letunic I, Bork P: **Interactive Tree Of Life (iTOL) v4: recent updates and new**  
1391 **developments.** *Nucleic Acids Res* 2019, **47**(W1):W256-W259.
- 1392 67. Chin CS, Peluso P, Sedlazeck FJ, Nattestad M, Concepcion GT, Clum A, Dunn C,  
1393 O'Malley R, Figueroa-Balderas R, Morales-Cruz A *et al*: **Phased diploid genome**  
1394 **assembly with single-molecule real-time sequencing.** *Nat Methods* 2016,  
1395 **13**(12):1050-1054.
- 1396 68. Otto TD, Sanders M, Berriman M, Newbold C: **Iterative Correction of Reference**  
1397 **Nucleotides (iCORN) using second generation sequencing technology.**  
1398 *Bioinformatics* 2010, **26**(14):1704-1707.
- 1399 69. Zerbino DR, Birney E: **Velvet: algorithms for de novo short read assembly using de**  
1400 **Bruijn graphs.** *Genome Res* 2008, **18**(5):821-829.
- 1401 70. Kurtz S, Phillippy A, Delcher AL, Smoot M, Shumway M, Antonescu C, Salzberg SL:  
1402 **Versatile and open software for comparing large genomes.** *Genome Biol* 2004,  
1403 **5**(2):R12.
- 1404 71. Carver T, Harris SR, Berriman M, Parkhill J, McQuillan JA: **Artemis: an integrated**  
1405 **platform for visualization and analysis of high-throughput sequence-based**  
1406 **experimental data.** *Bioinformatics* 2012, **28**(4):464-469.
- 1407 72. Carver TJ, Rutherford KM, Berriman M, Rajandream MA, Barrell BG, Parkhill J: **ACT:**  
1408 **the Artemis Comparison Tool.** *Bioinformatics* 2005, **21**(16):3422-3423.
- 1409 73. Robinson JT, Thorvaldsdottir H, Winckler W, Guttman M, Lander ES, Getz G, Mesirov  
1410 JP: **Integrative genomics viewer.** *Nat Biotechnol* 2011, **29**(1):24-26.
- 1411 74. Krzywinski M, Schein J, Birol I, Connors J, Gascoyne R, Horsman D, Jones SJ, Marra  
1412 MA: **Circos: an information aesthetic for comparative genomics.** *Genome Res* 2009,  
1413 **19**(9):1639-1645.
- 1414 75. Stanke M, Waack S: **Gene prediction with a hidden Markov model and a new intron**  
1415 **submodel.** *Bioinformatics* 2003, **19 Suppl 2**:ii215-225.

- 1416 76. Kim D, Pertea G, Trapnell C, Pimentel H, Kelley R, Salzberg SL: **TopHat2: accurate**  
1417 **alignment of transcriptomes in the presence of insertions, deletions and gene**  
1418 **fusions**. *Genome Biol* 2013, **14**(4):R36.
- 1419 77. Campbell MS, Holt C, Moore B, Yandell M: **Genome Annotation and Curation Using**  
1420 **MAKER and MAKER-P**. *Curr Protoc Bioinformatics* 2014, **48**:4 11 11-14 11 39.
- 1421 78. Lagesen K, Hallin P, Rodland EA, Staerfeldt HH, Rognes T, Ussery DW: **RNAmmer:**  
1422 **consistent and rapid annotation of ribosomal RNA genes**. *Nucleic Acids Res* 2007,  
1423 **35**(9):3100-3108.
- 1424 79. Jones P, Binns D, Chang HY, Fraser M, Li W, McAnulla C, McWilliam H, Maslen J,  
1425 Mitchell A, Nuka G *et al*: **InterProScan 5: genome-scale protein function**  
1426 **classification**. *Bioinformatics* 2014, **30**(9):1236-1240.
- 1427 80. Krogh A, Larsson B, von Heijne G, Sonnhammer EL: **Predicting transmembrane**  
1428 **protein topology with a hidden Markov model: application to complete genomes**. *J*  
1429 *Mol Biol* 2001, **305**(3):567-580.
- 1430 81. Petersen TN, Brunak S, von Heijne G, Nielsen H: **SignalP 4.0: discriminating signal**  
1431 **peptides from transmembrane regions**. *Nat Methods* 2011, **8**(10):785-786.
- 1432 82. Sargeant TJ, Marti M, Caler E, Carlton JM, Simpson K, Speed TP, Cowman AF:  
1433 **Lineage-specific expansion of proteins exported to erythrocytes in malaria**  
1434 **parasites**. *Genome Biol* 2006, **7**(2):R12.
- 1435 83. Li H, Durbin R: **Fast and accurate short read alignment with Burrows-Wheeler**  
1436 **transform**. *Bioinformatics* 2009, **25**(14):1754-1760.
- 1437 84. Morgulis A, Gertz EM, Schaffer AA, Agarwala R: **A fast and symmetric DUST**  
1438 **implementation to mask low-complexity DNA sequences**. *J Comput Biol* 2006,  
1439 **13**(5):1028-1040.
- 1440 85. McKenna A, Hanna M, Banks E, Sivachenko A, Cibulskis K, Kernytsky A, Garimella K,  
1441 Altshuler D, Gabriel S, Daly M *et al*: **The Genome Analysis Toolkit: a MapReduce**  
1442 **framework for analyzing next-generation DNA sequencing data**. *Genome Res* 2010,  
1443 **20**(9):1297-1303.
- 1444 86. Zhang Z, Li J, Zhao XQ, Wang J, Wong GK, Yu J: **KaKs\_Calculator: calculating Ka and**  
1445 **Ks through model selection and model averaging**. *Genomics Proteomics*  
1446 *Bioinformatics* 2006, **4**(4):259-263.
- 1447 87. Li L, Stoeckert CJ, Jr., Roos DS: **OrthoMCL: identification of ortholog groups for**  
1448 **eukaryotic genomes**. *Genome Res* 2003, **13**(9):2178-2189.
- 1449 88. Edgar RC: **MUSCLE: a multiple sequence alignment method with reduced time and**  
1450 **space complexity**. *BMC Bioinformatics* 2004, **5**:113.
- 1451 89. Capella-Gutierrez S, Silla-Martinez JM, Gabaldon T: **trimAl: a tool for automated**  
1452 **alignment trimming in large-scale phylogenetic analyses**. *Bioinformatics* 2009,  
1453 **25**(15):1972-1973.
- 1454 90. Stamatakis A: **RAxML version 8: a tool for phylogenetic analysis and post-analysis**  
1455 **of large phylogenies**. *Bioinformatics* 2014, **30**(9):1312-1313.
- 1456 91. Larsson A: **AliView: a fast and lightweight alignment viewer and editor for large**  
1457 **datasets**. *Bioinformatics* 2014, **30**(22):3276-3278.
- 1458  
1459  
1460  
1461  
1462

1463  
1464  
1465  
1466  
1467  
1468  
1469

## Figure legends

1470 **Figure 1. *Plasmodium vinckei* parasites and their phenotypic characteristics.**

1471 A) Rodent malaria parasite species and subspecies and the geographical sites in  
1472 sub-Saharan Africa where from which they were isolated (modified from [1]).  
1473 *Plasmodium vinckei* is the only RMP species to have been isolated from five different  
1474 locations. Inset: To date, several RMP isolates have been sequenced (black) to aid  
1475 research with rodent malaria models. Additional RMP isolates have been sequenced  
1476 in this study (red) to cover all subspecies of *P. vinckei* and further subspecies of  
1477 *Plasmodium chabaudi* and *Plasmodium yoelii*. B) Morphology of different life stages  
1478 of *P. vinckei baforti* EL. R: Ring, ET: early trophozoite, LT: Late trophozoite, S:  
1479 Schizont, MG: Male gametocyte, FG: Female gametocyte, O: oocyst and Sp:  
1480 Sporozoite. *Plasmodium vinckei* trophozoites and gametocytes are morphologically  
1481 distinct from other RMPs due to their rich haemozoin content (brown pigment). C)  
1482 Parasitaemia of ten *P. vinckei* isolates (split into two graphs for clarity) during  
1483 infections in mice (n=5) for a 20-day duration. † denotes host mortality. *Plasmodium*  
1484 *vinckei* isolates show significant diversity in their virulence phenotypes.

1485

1486 **Figure 2. Structural variations and genotypic diversity among *Plasmodium***

1487 ***vinckei* parasites.** A) Chromosomal rearrangements in *P. vinckei* parasites.  
1488 Pairwise synteny was assessed between the five *P. vinckei* subspecies and  
1489 *Plasmodium berghei* (to represent the earliest common RMP ancestor). The 14  
1490 chromosomes of different RMP genomes are arranged as a Circos plot and the

1491 ribbons (grey) between them denote regions of synteny. Three reciprocal  
1492 translocation events (red) and one inversion (blue) accompany the separation of the  
1493 different *P. vinckei* subspecies. A pan-*vinckei* reciprocal translocation between  
1494 chromosomes VIII and X was observed between *P. vinckei* and other RMP  
1495 genomes. Within the *P. vinckei* subspecies, two reciprocal translocations, between  
1496 chromosomes V and XIII, and between chromosomes V and VI, separate  
1497 *Plasmodium vinckei petteri* and *P. v. baforti* from the other three subspecies. A small  
1498 inversion of ~100 kb region in chromosome 14 has occurred in *PvvcY* alone. B)  
1499 Maximum likelihood phylogeny of different RMP species with high-quality reference  
1500 genomes based on protein alignment of 3,920 one-to-one orthologs (bootstrap  
1501 values of each node are shown). Genomes of three human malaria species-  
1502 *Plasmodium falciparum*, *Plasmodium vivax* and *Plasmodium knowlesi* were included  
1503 in the analysis as outgroups. C) Maximum likelihood phylogenetic tree of all  
1504 sequenced RMP isolates based on 1,010,956 high-quality SNPs (bootstrap values of  
1505 each node are shown). There exists significant genotypic diversity among the *P.*  
1506 *vinckei* isolates compared to the other RMPs. All *P. vinckei* subspecies have begun  
1507 to diverge from their common ancestor well before sub-speciation events within  
1508 *Plasmodium yoelii* and *Plasmodium chabaudi*. Genetic diversity within *P. v. petteri*  
1509 and *P. v. baforti* isolates are similar to those observed within *P. yoelii* and *P.*  
1510 *chabaudi* isolates while *P. v. lentum* and *P. v. brucechwatti* isolates have  
1511 exceptionally high and low divergences respectively. Genes with significantly high  
1512 Ka/Ks ratios in different subspecies-wise comparisons (as indicated by connector  
1513 lines), the gene's Ka/Ks ratio averaged across all indicated *P. vinckei* comparisons  
1514 and geographical origin of the isolates are shown.

1515



1516 **Figure 3. Sub-telomeric multigene family expansions in *Plasmodium vinckei***  
1517 **parasites. A)**

1518 Violin plots show sub-telomeric multigene family size variations among RMPs and  
1519 *Plasmodium falciparum*. The erythrocyte membrane antigen 1 and *fam-c* multigene  
1520 families are expanded in the non-Katangan *P. vinckei* parasites (red). Apart from  
1521 these families, multigene families have expanded in *P. vinckei* similar to that in  
1522 *Plasmodium chabaudi*. The Katangan isolate *Pv*vCY (purple) has a smaller number  
1523 of family members compared to non-Katangan isolates (orange) except for  
1524 lysophospholipases, *p235* and *pir* gene families. B) Maximum Likelihood phylogeny  
1525 of 99 *ema1* (top) and 328 *fam-c* (bottom) genes in RMPs. Branch nodes with good  
1526 bootstrap support (> 70) are marked in red. The first coloured band denotes the  
1527 RMP species to which the particular gene taxon belongs to. The heatmap denotes  
1528 the relative gene expression among rings, trophozoite, schizont and gametocyte  
1529 stages in the RMPs for which data are publicly available. Orange denotes high  
1530 relative gene expression and white denotes low relative gene expression, while grey  
1531 denotes lack of information. Gene expression was classified into three categories  
1532 based on FPKM level distribution- High (black) denotes the top 25% of ranked FPKM  
1533 of all expressed genes (FPKM > 256), Low (light grey) is the lower 25% of all  
1534 expressed genes (FPKM < 32) and Medium level expression (grey; 32 < FPKM < 256).  
1535 “P” denotes pseudogenes. Four *vinckei*-group (*P. chabaudi* and *P. vinckei*  
1536 subspecies) specific clades (Clades I-IV; orange), two *vinckei*-specific clade (Clade  
1537 IV and V; purple) and one non-Katangan-specific clade (Clade VI; blue) can be  
1538 identified within *ema1* family with strong gene expression, maximal during ring  
1539 stages. Rest of the family’s expansion within non-Katangan *P. vinckei* isolates are  
1540 mainly pseudogenes with weak transcriptional evidence. The *fam-c* gene phylogeny

1541 shows the presence of four distinctly distal clades (A) with robust basal support (96-  
1542 100). Of the four clades, two are pan-RMP (grey) and two are *vinckei* group-specific  
1543 (orange), each consisting of fam-c genes positionally conserved across the member  
1544 subspecies. Most members of these clades show medium to high gene expression  
1545 during asexual blood stages. Other well-supported clades can be classified as either  
1546 *berghei* group-specific (two; green), *vinckei* group-specific (two; orange), *P. vinckei* -  
1547 specific (two; purple) or non-Katangan *P. vinckei* -specific clades (three; blue). There  
1548 is evidence of significant species-specific expansion with striking examples in  
1549 *Plasmodium yoelii* (i), *P. chabaudi* (ii) and in *P. v. brucechwatti* (iii).

1550

#### 1551 **Figure 4. Phenotypic variation and genetics in *Plasmodium vinckei* parasites.**

1552 A) Schematic of isolate-specific genetic markers detected in clonal line of PvsEL X  
1553 PvsEH cross progeny by Sanger sequencing. Genetic markers from both EH (red)  
1554 and EL (blue) isolates were detected in the crossed progeny proving successful  
1555 genetic crossing. B) Schematic of homologous recombination-mediated insertion of a  
1556 gfp-luciferase cassette into the p230p locus in *P. vinckei* CY. C) GFP expression in  
1557 different blood stages of PvvCY and luciferase expression of PvvCY oocysts in  
1558 mosquito midgut.

#### 1559 **Tables**

1560 **Table 1. Genome assembly characteristics of five *Plasmodium vinckei***  
1561 **reference genomes.** AT-rich *P. vinckei* genomes are 19.2 to 19.5 megabasepairs  
1562 (Mbps) long except for PvvCY which has a smaller genome size of 18.3 Mb, similar  
1563 to *Plasmodium berghei*. PacBio long reads allowed for chromosomes to be  
1564 assembled as gapless unitigs with a few exceptions. Number of genes include partial  
1565 genes and pseudogenes. Copy numbers of the ten multigene families differ between

1566 the *P. vinckei* subspecies (*ema1*, erythrocyte membrane antigen 1, *etramp*, early  
1567 transcribed membrane protein, *hdh*, haloacid dehalogenase-like hydrolase, *lpl*,  
1568 lysophospholipases, *p235*, reticulocyte binding protein, *pir*, *Plasmodium* interspersed  
1569 repeat protein).

1570

## 1571 **Additional files**

1572 **Additional file 1. Summary of rodent malaria parasite isolates used and DNA**  
1573 **and RNA sequencing performed in this study.**

1574 **Additional file 2. Infection profiles of ten *Plasmodium vinckei* isolates.** Changes  
1575 in parasitaemia, host RBC density and host weight during *P. vinckei* infections. Error  
1576 bars show standard deviation of the readings within five biological replicates. †  
1577 denotes host mortality.

1578 **Additional file 3. Daily readings of parasitaemia, host RBC density and host**  
1579 **weight during infections of *Plasmodium vinckei* isolates.**

1580 **Additional file 4. Assembly statistics of *Plasmodium vinckei* mitochondrial and**  
1581 **apicoplast genomes.**

1582 **Additional file 5. Chromosomal synteny breakpoints among *Plasmodium***  
1583 ***vinckei* genomes.**

1584 **Additional file 6. 3,920 one-to-one orthologous group used for genome-wide**  
1585 **protein alignment-based phylogeny.**

1586 **Additional file 7. Single nucleotide polymorphisms among RMP isolates and**  
1587 **Ka/Ks ratios for various pair-wise comparisons of homologous protein-coding**  
1588 **genes.**

1589 **Additional file 8. Copy number variations within multigene families and**  
1590 **phylogenetic clade members.**

- 1591 **Additional file 9. Maximum Likelihood trees for ten RMP multigene families.**
- 1592 **Additional file 10. Gene-wise RNA-seq FPKM values for *Plasmodium vinckei***
- 1593 ***petteri* CR, *P. v. lentum* DS (Rings, trophozoites and gametocyte stages), *P. v.***
- 1594 ***brucechwatti* DA and *P. v. baforti* EL (mixed blood stages).**
- 1595 **Additional file 11. Mosquito transmission and genetic cross experiments.**
- 1596 **Additional file 12. A) Circos figure showing rearrangements among four RMP**
- 1597 **species B) Gene alignment of pseudogenised *ema1* genes.**
- 1598
- 1599

A

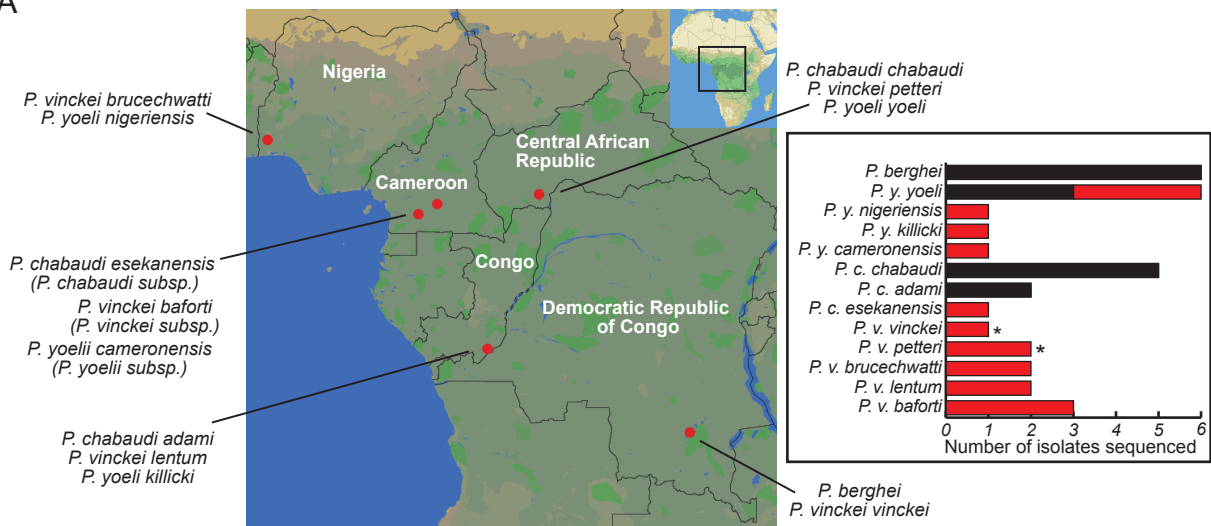

B

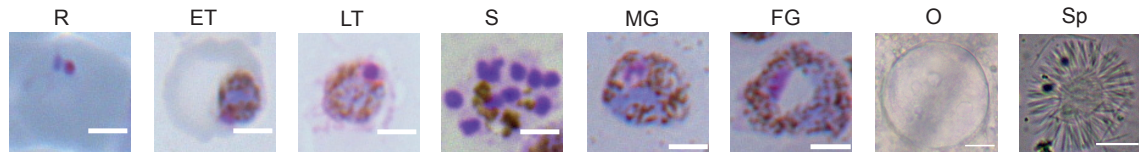

C

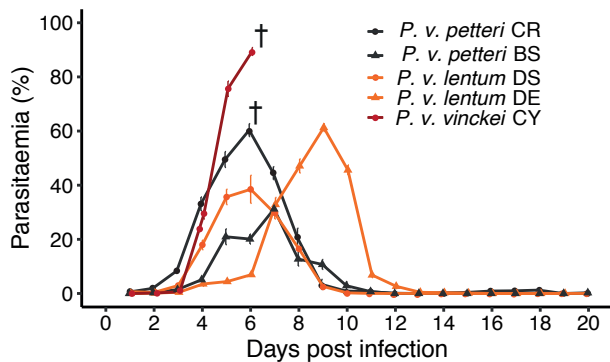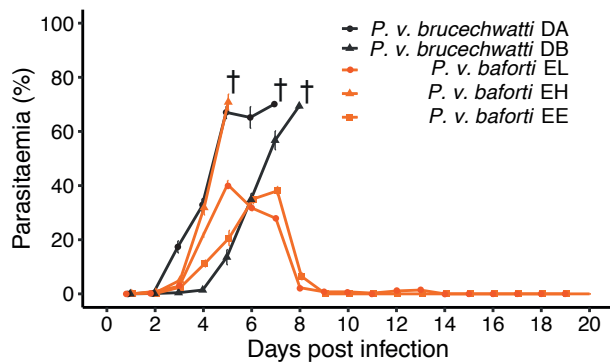

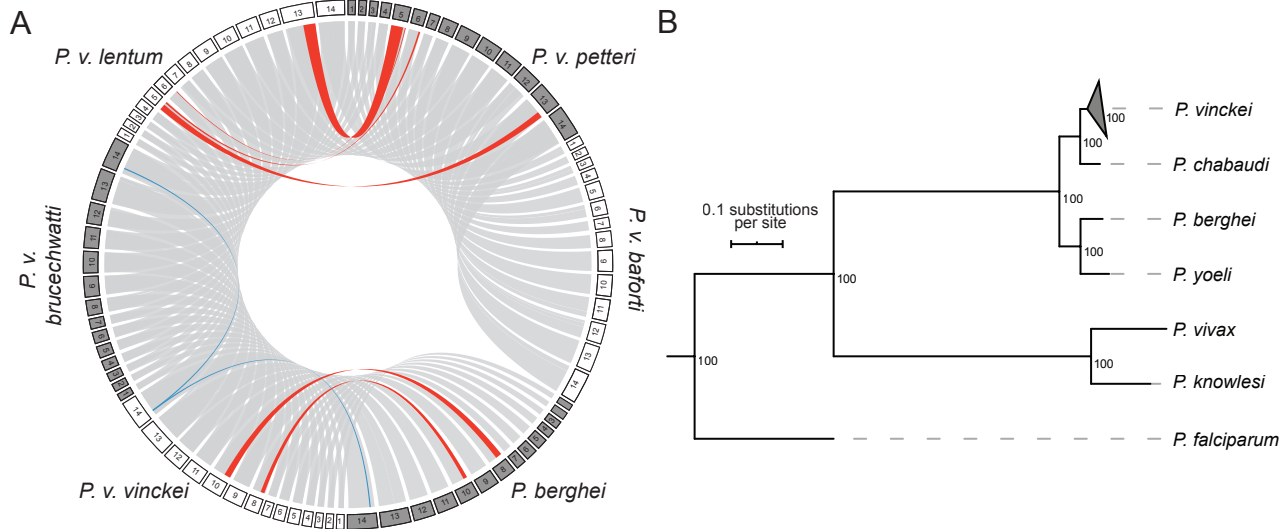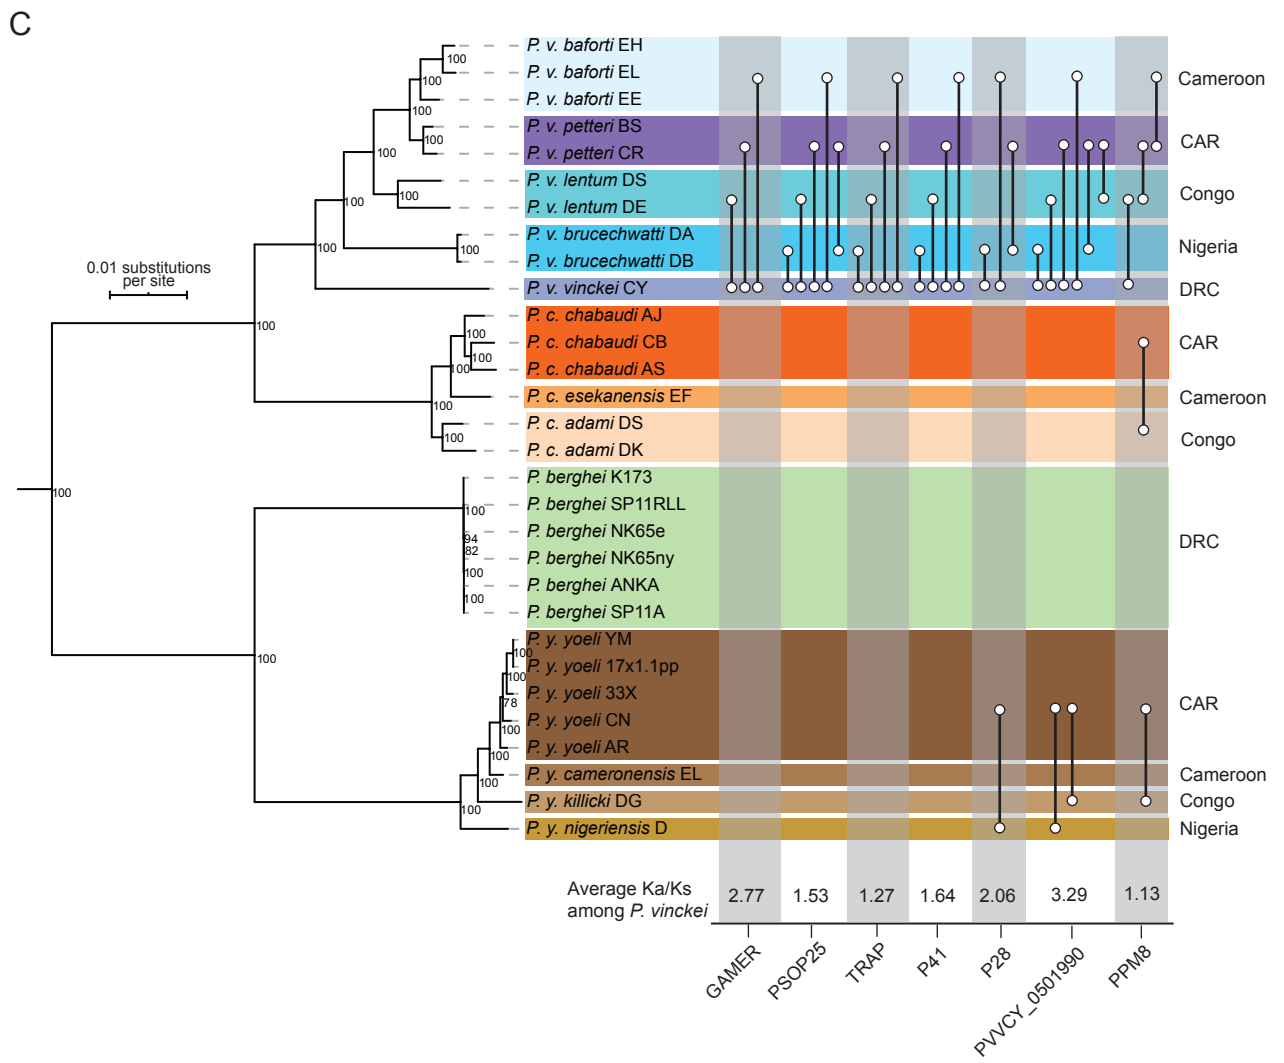

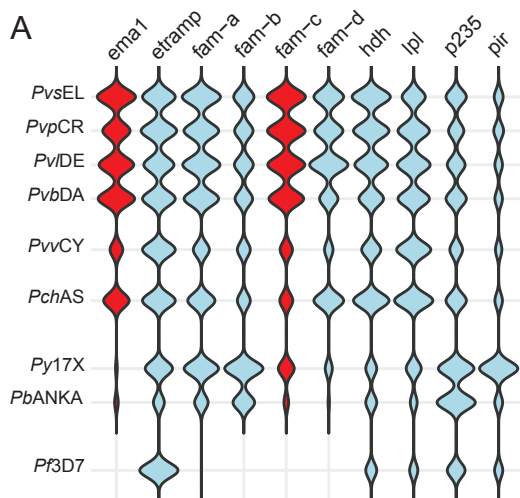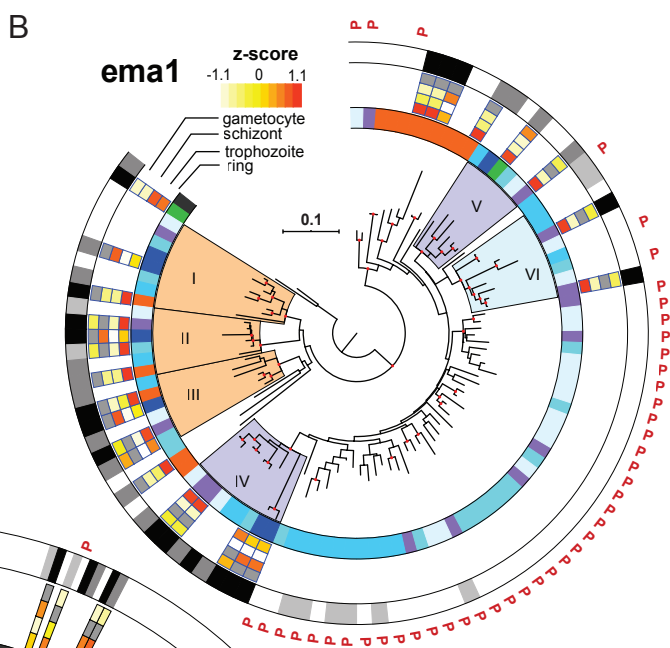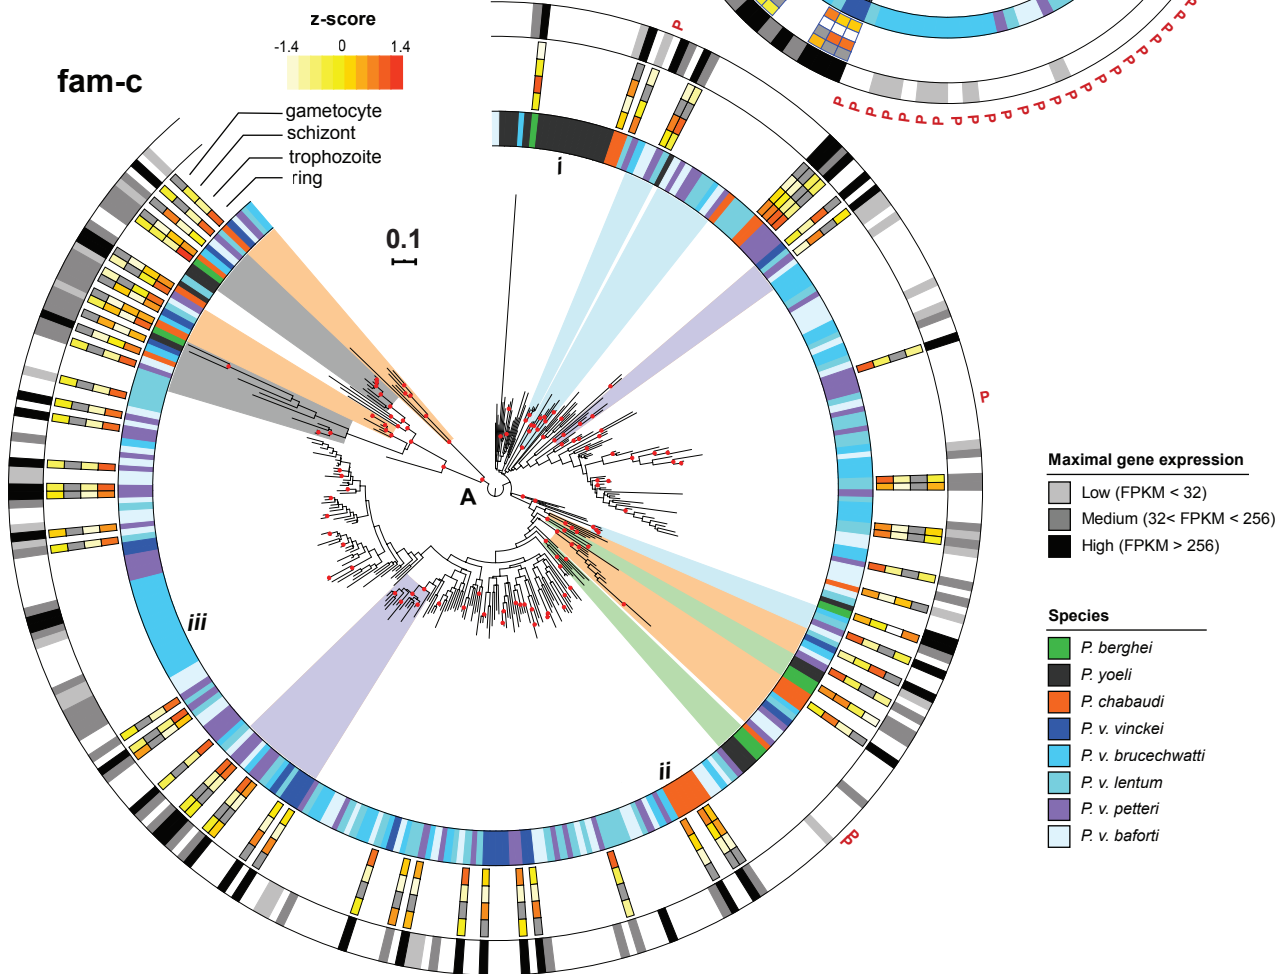

**A** ■ Gene derived from *P. vinckei baforti* EL  
■ Gene derived from *P. vinckei baforti* EH

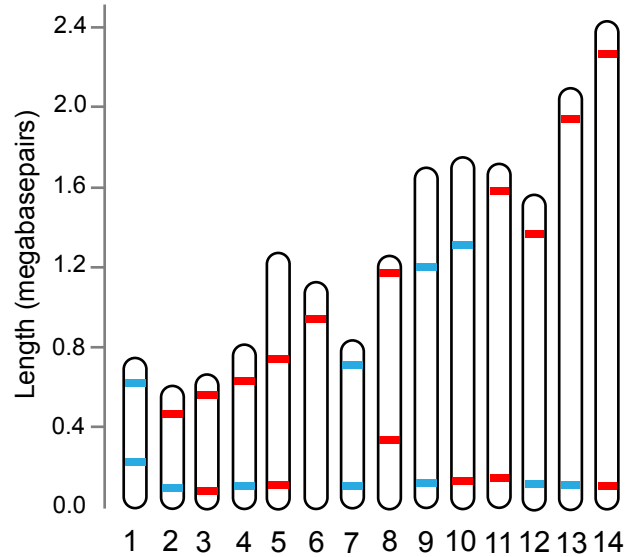

**B**

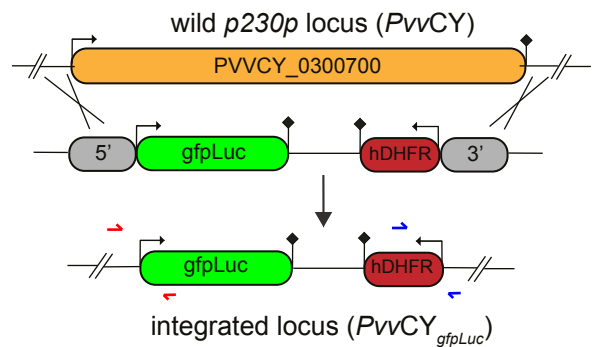

**C**

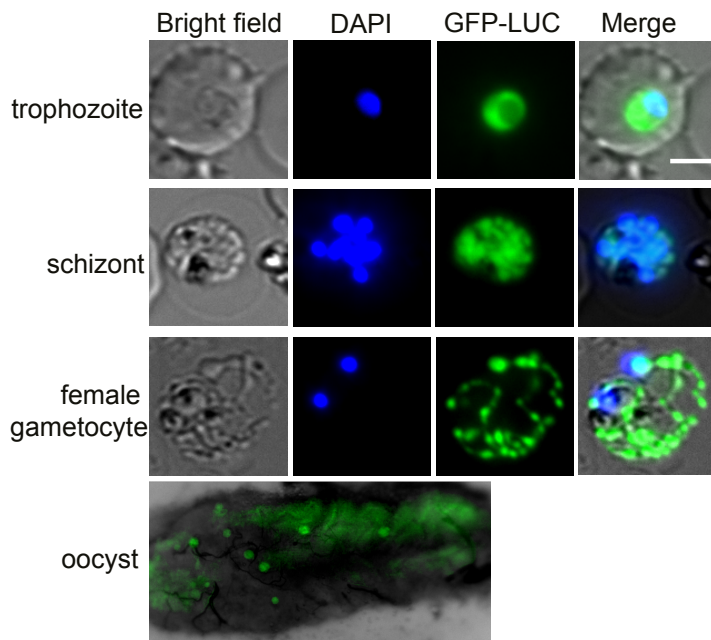

Source: https://www.biorxiv.org/content/10.1101/2020.09.07.286369v1.full.pdf
